1 Phosphorylation of the ancestral histone variant H3.3 amplifies stimulation-induced  
2 transcription

3  
4 Anja Armache<sup>1,#</sup>, Shuang Yang<sup>2,#</sup>, Lexi E Robbins<sup>3</sup>, Ceyda Durmaz<sup>3</sup>, Andrew W Daman<sup>3</sup>, Jin Q  
5 Jeong<sup>3</sup>, Alexia Martínez de Paz<sup>3</sup>, Arjun Ravishankar<sup>3</sup>, Tanja Arslan<sup>4</sup>, Shu Lin<sup>5</sup>, Tanya  
6 Panchenko<sup>1,6</sup>, Benjamin A. Garcia<sup>5</sup>, Sandra B. Hake<sup>4,7</sup>, Haitao Li<sup>2,\*</sup>, C. David Allis<sup>1,\*</sup>, Steven Z.  
7 Josefowicz<sup>3,\*</sup>

8  
9 <sup>1</sup> The Rockefeller University, Laboratory of Chromatin Biology and Epigenetics, New York, NY,  
10 US 10065

11  
12 <sup>2</sup> Center for Life Sciences, Tsinghua University, Beijing, China 100084

13  
14 <sup>3</sup> Weill Cornell Medicine, Laboratory of Epigenetics and Immunity, New York, NY, US 10065

15  
16 <sup>4</sup> Adolf-Butenandt Institute, Ludwig-Maximilians University, Munich, Germany, 80336

17  
18 <sup>5</sup> Epigenetics Institute, Department of Biochemistry and Biophysics, University of  
19 Pennsylvania, Philadelphia, PA, US 19104

20  
21 <sup>6</sup> Current Address: Perlmutter Cancer Center, New York University Langone Medical Center,  
22 New York, NY 10016

23  
24 <sup>7</sup> Current Address: Institute for Genetics, Justus-Liebig-University Giessen, Germany 35392

25  
26 # equal contribution

27  
28 \* Corresponding Authors  
29 [szj2001@med.cornell.edu](mailto:szj2001@med.cornell.edu)  
30 [alliscd@rockefeller.edu](mailto:alliscd@rockefeller.edu)  
31 [lht@tsinghua.edu.cn](mailto:lht@tsinghua.edu.cn)

32  
33  
34  
35  
36  
37  
38  
39  
40  
41  
42  
43  
44  
45  
46  
47  
48  
49  
50  
51  
52

53  
54  
55  
56  
57  
58  
59  
60  
61  
62  
63  
64  
65  
66  
67  
68  
69  
70  
71  
72  
73  
74  
75  
76  
77  
78  
79  
80  
81  
82  
83  
84  
85  
86  
87  
88  
89  
90  
91  
92  
93  
94  
95  
96  
97  
98  
99  
100  
101  
102  
103  
104

Abstract:

Complex organisms are able to rapidly induce select genes among thousands in response to diverse environmental cues. This occurs in the context of large genomes condensed with histone proteins into chromatin. The macrophage response to pathogen sensing, for example, rapidly engages highly conserved signaling pathways and transcription factors (TFs) for coordination of inflammatory gene induction<sup>1-3</sup>. Enriched integration of histone H3.3, the ancestral histone H3 variant, is a feature of inflammatory genes and, in general, dynamically regulated chromatin and transcription<sup>4-7</sup>. However, little is known of how chromatin is regulated at rapidly induced genes and what features of H3.3, conserved from yeast to human, might enable rapid and high-level transcription. The amino-terminus of H3.3 contains a unique serine residue as compared with alanine residues found in “canonical” H3.1/2. We find that this H3.3-specific serine residue, H3.3S31, is phosphorylated (H3.3S31ph) in a stimulation-dependent manner along the gene bodies of rapidly induced response genes in mouse macrophages responding to pathogen sensing. Further, this selective mark of stimulation-responsive genes directly engages histone methyltransferase (HMT) SETD2, a component of the active transcription machinery. Our structure-function studies reveal that a conserved positively charged cleft in SETD2 contacts H3.3S31ph and specifies preferential methylation of H3.3S31ph nucleosomes. We propose that features of H3.3 at stimulation induced genes, including H3.3S31ph, afford preferential access to the transcription apparatus. Our results provide insight into the function of ancestral histone variant H3.3 and the dedicated epigenetic mechanisms that enable rapid gene induction, with implications for understanding and treating inflammation.

105  
106  
107  
108  
109  
110  
111  
112  
113  
114  
115  
116  
117  
118  
119  
120  
121  
122  
123  
124  
125  
126  
127  
128  
129  
130  
131  
132  
133  
134  
135  
136  
137  
138  
139  
140  
141  
142  
143  
144  
145  
146  
147  
148  
149  
150  
151  
152  
153  
154  
155  
156

A poorly understood feature of stimulation-induced genes is their ability to effectively engage the general transcription machinery for rapid expression. Selective, induced gene transcription, for example during heat shock<sup>8</sup> or the inflammatory response, occurs rapidly and robustly, despite these genes' *de novo* expression among thousands of constitutively expressed genes. We considered that stimulation-induced transcription may be controlled by dedicated epigenetic mechanisms in cooperation with signal-activated transcription factors (TFs). Among stimulation-responsive features of chromatin, histone phosphorylation can be an efficient and potent means of transmitting signals via kinase cascades to chromatin regions associated with stimulation-responsive genes with the potential to augment their transcription<sup>9–14</sup>.

H3.3 is the conserved, ancestral H3 variant and the only H3 present in some simple eukaryotes, including *S. cerevisiae*. In complex organisms, H3.3 is uniquely expressed outside of the cell cycle and plays a variety of roles in transcription, genomic stability and mitosis, while so-called “canonical” H3.1/2 histones are expressed in a “replication-dependent” manner and provide a principal packaging role to accommodate the doubling genome<sup>15,16</sup>. The amino-terminal H3.3 ‘tail’ differs from that of H3.1/2 by a single amino acid, a serine at position 31 in H3.3 in place of an alanine in H3.1/2 (Fig. 1A and fig. S1A). Despite the well-characterized enrichment of H3.3 in dynamic chromatin, the potential regulatory roles of H3.3S31 and H3.3-specific phosphorylation are unknown<sup>4–7,17</sup>. Here, we report that H3.3 phosphorylation at the conserved and H3.3-specific serine 31 (H3.3S31ph) amplifies the rapid, high-level transcription of stimulation-induced gene expression. We present a specific biophysical mechanism that provides these select genes with augmented transcriptional capacity.

To identify candidate chromatin regulatory mechanisms with a delegated role during cellular stimulation we biochemically purified histones from resting and bacterial lipopolysaccharide (LPS) stimulated macrophages and quantified residue-specific histone post translational modifications (PTMs) by mass spectrometry (MS). Given our interest in the H3.3-specific S31 we targeted peptides containing the H3.3S31 residue in our MS analysis. H3.3S31ph is undetectable in resting macrophages and increases upon stimulation, while the total level of H3.3 protein remains unchanged (Fig. 1B). In support, we developed a specific antibody (fig. S1B-F) and confirmed, by western blot, the stimulation-induced nature and rapid kinetics of H3.3S31ph, paralleling ERK phosphorylation (Fig 1C). Importantly, given the extensive phosphorylation of histones in mitosis, including H3.3S31 (fig.S1B-F)<sup>18</sup>, the post-mitotic nature of primary mouse bone marrow derived macrophages (BMDM) enabled us to distinguish stimulation-associated histone phosphorylation from mitotic events in bulk populations of cells (fig. S1G).

To establish the genomic location of stimulation-induced H3.3S31ph, we performed chromatin immunoprecipitation followed by whole genome sequencing (ChIP seq) in resting and stimulated (60' LPS) macrophages. We compared H3.3S31ph localization to H3S28ph. H3S28ph is enriched at promoters, enhancers, and generally across large domains that contain LPS-induced genes, consistent with its role in early events of chromatin activation and transcription<sup>14</sup>. While the H3.3S31ph ChIP signal is enriched in stimulated versus resting macrophages, in striking contrast to H3S28ph, it strictly delineates the “gene bodies” (transcription start site, TSS, to transcription end site, TES) of many LPS-induced genes (Fig. 1D).

A preliminary survey of H3.3S31ph ChIP distribution revealed that its deposition appeared to be specific for stimulation-induced genes (including *Tnf*, *Nfkb1a*, *Il1a*, *Il1b*, *Ccl4*, *Cxcl2*, *Tnfrsf3*)

157 and is not simply a feature of highly transcribed or constitutively expressed genes (fig. S2). To  
158 better evaluate the identity of H3.3S31ph-enriched genes in an unbiased manner and explore  
159 the relationship between genic ChIP signal densities of H3.3S31ph and LPS-induced genes,  
160 we ranked all annotated genes by H3.3S31ph ChIP signal density (TSS-TES) in resting and  
161 stimulated macrophages. This analysis shows that many more genes acquire high-density  
162 H3.3S31ph upon stimulation compared with resting cells (Fig. 1E), which is consistent with our  
163 MS and other global analysis of H3.3S31ph levels. Additionally, several of the top ranked  
164 genes (note, by density, not fold change) are prominent LPS-induced genes, including *Tnfrsf3*  
165 (A20), *Tnf*, *Il1a*, and *Plk2* (Fig. 1E). We then defined a threshold for the top 1% of genes by  
166 H3.3S31ph density in stimulated macrophages (167 genes) for gene ontology analysis and  
167 found that the most enriched category is “response to stimulus” (p-value=2.88 x 10<sup>-21</sup>)  
168 reflecting the stimulation-induced nature of genes featuring H3.3S31ph (Fig. 1F). We  
169 compared the H3.3S31ph chromatin state to other “active” chromatin states including  
170 H3K27ac, H3K36me3, and H3S28ph as they relate to stimulation-induced gene expression.  
171 Our analysis showed that the top 1% of H3.3S31ph genes (by ChIP density in stimulated  
172 macrophages) was highly enriched for stimulation-induced genes (Fig. 1G, fig. S3). Thus,  
173 selective deposition of H3.3S31ph at genes with *de novo*, signal-induced transcription  
174 indicates a dedicated role in stimulation-responsive transcription rather than constitutive  
175 transcription.

176  
177 In considering possible mechanisms by which H3.3S31ph may regulate transcription, we  
178 focused on the gene body localization of this stimulation-dependent histone phosphorylation  
179 event. We considered the possibility that H3.3S31ph may be linked to another well-studied  
180 histone PTM, the co-transcriptional H3K36me3. H3K36me3 is mediated by a single histone  
181 methyltransferase (HMT), SETD2, while members of the NSD family of H3K36-specific  
182 methyltransferases can mono- and di-methylate H3K36<sup>19</sup>. SETD2, and specifically the tri-  
183 methylation of H3K36, are considered to play an important role in transcription fidelity at highly  
184 expressed genes, transcription-associated genic DNA methylation, and mRNA splicing<sup>20–22</sup>.  
185 Therefore, we assessed the colocalization and correlation between these two histone PTMs at  
186 stimulation-induced genes. We found strikingly similar gene body localization of H3.3S31ph  
187 and H3K36me3 in stimulated macrophages, distinct from enhancer and promoter regions  
188 delineated by H3K27ac and intergenic regions marked by H3K36me2 (Fig. 2A). Intriguingly,  
189 while H3.3S31ph was stimulation-dependent, H3K36me3 was present at modest levels in  
190 resting macrophages and increased upon stimulation and induction of associated genes, likely  
191 representing a transcriptionally poised state of these genes (Fig. 2A, fig. S3B). While overall,  
192 we find enrichment of H3.3 and “active” histone PTMs at LPS-induced genes, H3.3S31ph and  
193 H3K36me3 are especially prominent in their enrichment at these genes (Fig. 2A-B, fig. S3A-C).  
194 Further, average ChIP density profiling for H3.3S31ph and H3K36me3 across all LPS-induced  
195 genes revealed their matching gene-body distribution and stimulation-induced enrichment in  
196 this class of genes (Fig. 2A, C). While co-localized at LPS-induced genes, an important  
197 distinction between these two histone PTMs is that H3K36me3 is a ubiquitous feature of  
198 transcribed genes, while H3.3S31ph appears to have a dedicated function at stimulation-  
199 induced genes (fig. S3C).

200  
201 Thus, H3.3S31ph is a feature of stimulation-responsive chromatin, is rapidly and specifically  
202 deposited along the gene bodies of stimulation-induced genes, and at these genes shares a  
203 common genomic distribution and stimulated deposition with H3K36me3. These findings  
204 suggested cross-talk between these two histone PTMs, and we hypothesized that H3.3S31ph  
205 may endow stimulation-induced genes with the capacity for augmented transcription, in part  
206 through the stimulation of H3K36me3. To test if H3.3S31ph may determine H3K36me3  
207 densities at LPS-induced genes, we compared H3.3S31ph ChIP density changes between  
208 resting and stimulated BMDM with changes in H3K36me3 (catalyzed by SETD2) and



209 H3K36me2 (NSD1, NSD2, NSD3, ASH1L, SMYD2, SETMAR). This analysis demonstrated a  
210 high correlation between the density change in H3.3S31ph and H3K36me3 (Spearman's  
211 correlation, 0.8) but not H3K36me2 (Spearman's correlation, -0.2) (Fig. 2D).

212  
213 Given this link between H3.3S31ph and H3K36me3 as well as their physical proximity on the  
214 H3.3 tail (Fig. 1A), we considered the possibility that H3.3S31ph may directly augment the  
215 activity of HMT SETD2, the enzyme catalyzing H3K36me3. To test this hypothesis, we  
216 assessed recombinant SETD2-SET domain enzymatic activity *in vitro* on nucleosome  
217 substrates assembled from recombinant core histones, either with normal H3.3 tail sequence,  
218 or bearing the phospho-mimicking glutamic acid mutation at residue 31 (S31E). Processive  
219 SETD2 HMT activity on H3.3K36 was measured by western blot read out during a reaction  
220 time course using antibodies specific for K36me2 and K36me3. For comparison, we also  
221 performed these assays with the K36me2-specific enzyme NSD2. Under standard assay  
222 conditions, both enzymes accumulated their products throughout the 25 minute time course,  
223 however, SETD2 activity was potently stimulated by the phospho-mimicking H3.3S31E mutant,  
224 while NSD2 activity was substantially reduced (Fig. 3A).

225  
226 Structural studies of the SETD2 SET domain have revealed a basic patch along the path of the  
227 H3 amino-terminal tail as it extends from the catalytic site<sup>23,24</sup>. We speculated that such a  
228 feature could provide the basis of a specific enhanced interaction between SETD2 and  
229 H3.3S31ph nucleosome substrates and that these interactions might link the augmented  
230 enzymatic activity we observed to structural properties.

231  
232 Therefore, we solved the crystal structure of the human SETD2 catalytic domain bound to the  
233 H3.3 peptide H3.3S31phK36M (S31 phosphorylated, and K36 mutated to M to stabilize the  
234 H3.3 peptide in the catalytic site) at 1.78Å (Fig. 3B-C, Table S1). In the resulting structure, the  
235 electrostatic surface view of SETD2 shows that the H3.3 peptide is embedded in the substrate-  
236 binding channel of SETD2 (Fig. 3B). Notably, the N-terminal fragment of H3.3 extends from the  
237 active site to the exit of SETD2 substrate channel, which is exclusively enriched with basic  
238 residues. The electron density of the H3.3S31 phosphate group is clearly visualized.  
239 Specifically, the hydroxyl oxygen from H3.3S31ph forms a salt bridge with K1673 of SETD2,  
240 and water-mediated hydrogen bonding with adjacent K1600 of SETD2 (Fig. 3B-C). Thus,  
241 SETD2 K1600 and K1673 provide a channel with positive charge that accommodates and  
242 provides charge-complementarity for H3.3S31ph substrate while H3.3K36 is positioned at the  
243 active site. Given their potential significance in the observed interactions between H3.3S31ph  
244 and SETD2, we evaluated the sequence conservation at and around these lysine residues  
245 across phylogeny (Fig. 3D top) and within H3K36 methyltransferases (Fig. 3D bottom).  
246 Remarkably, we find that the basic residues K1600 and K1673 are highly conserved in  
247 metazoan SETD2 (conserved across vertebrates and replaced by highly similar Arg in *C.*  
248 *elegans* and *D. melanogaster* and His in *S. cerevisiae*). In contrast to this high degree of cross-  
249 species conservation within SETD2 orthologs, other H3K36 HMTs (NSD family, etc.) frequently  
250 replace these basic residues with acidic or polar amino acids (Fig. 3D, bottom).

251  
252 To directly assess the function of these conserved SETD2 lysine residues that engage in  
253 specific interactions with H3.3S31ph, we generated recombinant SETD2 SET-domain proteins  
254 with mutated lysines, individually and combined (K1600E, K1673E, and K1600E/K1673E).  
255 Wild type and mutant SETD2 enzymes were then assessed for their activity on unmodified as  
256 well as H3.3S31E-containing nucleosomes. As before, we observed potent stimulatory activity  
257 of H3.3S31E nucleosomes over unmodified nucleosomes (Fig. 3A, E), however, H3.3S31E-  
258 augmented SETD2 activity was decreased in single mutants (K1600E and K1673E) and  
259 reversed in the double K1600E/K1673E SETD2 mutant.

260

261 Together, our cellular, epigenomic, and structure-function studies suggest H3.3S31ph-  
262 augmented SETD2 activity as a feature of enhanced stimulation-induced transcription. This  
263 indicates a mechanism by which stimulation-induced genes may be endowed with preferential  
264 access to (and dependency on) SETD2 for rapid, high-level expression. To test this  
265 hypothesis, we performed SETD2 siRNA knockdown in BMDM before LPS stimulation. We  
266 find that expression of LPS-induced genes with H3.3S31ph, *Tnf*, *Plk2*, *Cxcl2*, is highly  
267 dependent on SETD2, compared with constitutively expressed *Tbp* (Fig. 3F, fig. S4A).  
268

269 Functional perturbations of histone genes are made difficult by their essential role in diverse  
270 cellular function and their genetic complexity (there are 15 copies of the H3 gene in mouse and  
271 human). However, because there are only two genes for the histone H3.3 variant containing  
272 the S31 residue (*H3f3a* and *H3f3b*) we were able to target these genes by CRISPR. H3.3 is  
273 required for embryogenesis<sup>25-28</sup> and spermatogenesis<sup>29</sup>. Further, as we find here (fig. S3),  
274 H3.3 is enriched at inflammatory genes, though its function in this context is unknown<sup>6,30</sup>. To  
275 study the function of H3.3 in inflammatory gene induction we generated *H3f3a/H3f3b* double  
276 knockout (DKO) RAW264.7 (macrophage-like) mouse cell lines through CRISPR targeting of  
277 both *H3f3a* and *H3f3b*. Given its critical role in development, we also selected a hypomorphic  
278 (HYPO) RAW264.7 clone, with a null *H3f3a* allele and hypomorphic *H3f3b* allele (fig. S4B).  
279

280 These wild type, DKO, and HYPO macrophage cell lines were then assessed for their ability to  
281 induce inflammatory genes following stimulation with LPS in the absence of the H3 protein  
282 containing the H3.3-specific S31 residue. While these cell lines grow comparably (not shown),  
283 assessment of their ability to rapidly respond to stimulation by RNAseq revealed substantial  
284 decreases in induced expression of LPS-induced genes in both DKO and HYPO macrophage  
285 cell lines (Fig 4A-B, fig. S4C-D). At 60 minutes and 120 minutes following stimulation with LPS,  
286 we observed a global reduction in LPS-induced gene expression in DKO and HYPO cell lines  
287 (Fig. 4B-C, fig. S4D). We found that LPS-induced genes characterized by the highest levels of  
288 H3.3S31ph were expressed, on average, at 3-times the level of all LPS-induced genes and  
289 also had consistently decreased expression in H3.3 HYPO and DKO cells (Fig. 4C-D, fig.  
290 S4D).  
291

292 The inflammatory gene induction defect in H3.3 HYPO and DKO cells responding to LPS  
293 occurs despite the presence of 13 other copies of H3.1/2, abundantly expressed in these  
294 rapidly cycling cells. Given that the only H3.3 “tail” sequence difference is S31 and our results  
295 that demonstrate a dedicated role for H3.3S31ph at stimulation responsive genes, we suggest  
296 that H3.3S31ph contributes to the function of H3.3 that we observe in these experiments (Fig.  
297 4). Our structural and enzymatic studies of Setd2 activity (Fig. 3) highlight specific biophysical  
298 mechanisms that may link H3.3 to augmented transcription. However, key unknowns remain  
299 on the function of this ancestral H3.3 variant, including the relative function of the H3.3S31  
300 residue and its phosphorylation, the signaling pathways that link stimulation to H3.3S31ph in  
301 chromatin, and the breadth of the mechanisms that we describe here, both across species and  
302 cell types.  
303

304 Dedicated mechanisms enabling rapid stimulation-induced transcription are relevant to diverse  
305 cell responses and disease states, and may represent more selective therapeutic targets than  
306 the general transcription machinery<sup>31-33</sup>. In the context of inflammatory gene induction,  
307 numerous studies have revealed signals, TFs, and chromatin features that drive stimulation  
308 responsive genes (reviewed in <sup>2,34,35</sup>). However, explanation of inducible genes’ preferential  
309 access to the transcription apparatus and suitability for speed and scope of transcription in the  
310 form of dedicated chromatin mechanisms have remained obscure. Our epigenomic and  
311 biochemical studies link selectively deposited H3.3S31ph at stimulation-induced genes to  
312 augmented SETD2 activity and co-transcriptional H3K36me3, enabling rapid and high-level

313 transcription of these genes. Together with our previous characterization of H3S28  
314 phosphorylation in early stimulation-induced chromatin activation<sup>14</sup>, these studies reveal  
315 mechanisms for the dedicated role of histone phosphorylation in *de novo* transcription. We  
316 propose that selectively employed deposition of histone PTMs at these genes, including H3.3-  
317 specific H3.3S31ph, provides a signature that specifies preferential access to the transcription  
318 apparatus, endowing cells with the essential capacity for rapid and selective environmental  
319 responsiveness.

320

321 Acknowledgements: This work was supported by the following funding sources:  
322 R01GM040922 (C.D.A.), R00GM113019 (S.Z.J.), CIPSM (S.B.H.). We thank John Zinder for  
323 contributing the SETD2-pETduet-smt3 construct; Congcong Lu, Simone Sidoli (lab of B.A.G.)  
324 for H3.3 peptide analysis; members of Weill Cornell Applied Bioinformatics Core, Doron Betel,  
325 Paul Zumbo, Friederike Dundar, and Luce Skrabanek for suggestions and assistance with  
326 bioinformatics; Alexey Soshnev for help with figures.

327

328 Author Contributions: A.A. and S.Z.J. designed the study, performed biochemical, cellular, and  
329 epigenomic experiments and analyzed the data. S.Y. performed structural studies supervised  
330 by H.L., L.E.R., C.D., A.W.D., J.Q.J., A.L.M., A.R., performed experiments and analyzed data  
331 supervised by S.Z.J.. T.P. assisted A.A. with nucleosome assembly and enzymatic assays.  
332 T.A. and S.B.H. developed and tested the H3.3 antibody. S.L. performed mass spectrometry  
333 studies supervised by B.A.G.. S.Z.J. wrote the manuscript with input from all authors. C.D.A.,  
334 H.L., and S.Z.J. supervised the study.

335

336 Competing Interests: None

337

338 Materials and Correspondence: S.Z.J., [szj2001@med.cornell.edu](mailto:szj2001@med.cornell.edu)

339

340 References:

341

- 342 1. Medzhitov, R. & Horng, T. Transcriptional control of the inflammatory response. *Nat.*  
343 *Rev. Immunol.* **9**, 692–703 (2009).
- 344 2. Smale, S. T., Tarakhovsky, A. & Natoli, G. Chromatin Contributions to the Regulation of  
345 Innate Immunity. *Annu. Rev. Immunol.* **32**, 489–511 (2014).
- 346 3. Akira, S., Uematsu, S. & Takeuchi, O. Pathogen Recognition and Innate Immunity. *Cell*  
347 **124**, 783–801 (2006).
- 348 4. Filipescu, D., Szenker, E. & Almouzni, G. Developmental roles of histone H3 variants  
349 and their chaperones. *Trends Genet.* **29**, 630–640 (2013).
- 350 5. Henikoff, S. & Smith, M. M. Histone variants and epigenetics. *Cold Spring Harb.*  
351 *Perspect. Biol.* (2015). doi:10.1101/cshperspect.a019364
- 352 6. Kamada, R. *et al.* Interferon stimulation creates chromatin marks and establishes  
353 transcriptional memory. *Proc. Natl. Acad. Sci. U. S. A.* **115**, E9162–E9171 (2018).
- 354 7. Shi, L., Wen, H. & Shi, X. The Histone Variant H3.3 in Transcriptional Regulation and  
355 Human Disease. *J. Mol. Biol.* **429**, 1934–1945 (2017).
- 356 8. Duarte, F. M. *et al.* Transcription factors GAF and HSF act at distinct regulatory steps to  
357 modulate stress-induced gene activation. *Genes Dev.* **30**, 1731–46 (2016).
- 358 9. Healy, S., Khan, P., He, S. & Davie, J. R. Histone H3 phosphorylation, immediate-early  
359 gene expression, and the nucleosomal response: a historical perspective 1.  
360 doi:10.1139/O11-092
- 361 10. Rossetto, D., Avvakumov, N. & Côté, J. Histone phosphorylation: A chromatin  
362 modification involved in diverse nuclear events. *Epigenetics* **7**, 1098–1108 (2012).
- 363 11. Sawicka, A. *et al.* H3S28 phosphorylation is a hallmark of the transcriptional response to  
364 cellular stress. *Genome Res.* **24**, 1808–1820 (2014).

- 365 12. Zippo, A. *et al.* Histone Crosstalk between H3S10ph and H4K16ac Generates a Histone  
366 Code that Mediates Transcription Elongation. *Cell* **138**, 1122–1136 (2009).
- 367 13. Lau, P. N. I. & Cheung, P. Histone code pathway involving H3 S28 phosphorylation and  
368 K27 acetylation activates transcription and antagonizes polycomb silencing. *Proc. Natl.*  
369 *Acad. Sci.* (2011). doi:10.1073/pnas.1012798108
- 370 14. Josefowicz, S. Z. *et al.* Chromatin Kinases Act on Transcription Factors and Histone  
371 Tails in Regulation of Inducible Transcription. *Mol. Cell* **64**, 347–361 (2016).
- 372 15. Waterborg, J. H. Evolution of histone H3: emergence of variants and conservation of  
373 post-translational modification sites 1 This article is part of Special Issue entitled  
374 Asilomar Chromatin and has undergone the Journal's usual peer review process.  
375 *Biochem. Cell Biol.* **90**, 79–95 (2012).
- 376 16. Duronio, R. J. & Marzluff, W. F. Coordinating cell cycle-regulated histone gene  
377 expression through assembly and function of the Histone Locus Body. *RNA Biology*  
378 (2017). doi:10.1080/15476286.2016.1265198
- 379 17. Zink, L.-M. & Hake, S. B. Histone variants: nuclear function and disease. *Curr. Opin.*  
380 *Genet. Dev.* **37**, 82–89 (2016).
- 381 18. Hake, S. B. *et al.* Serine 31 phosphorylation of histone variant H3.3 is specific to regions  
382 bordering centromeres in metaphase chromosomes. *Proc. Natl. Acad. Sci.* **102**, 6344–  
383 6349 (2005).
- 384 19. Wagner, E. J. & Carpenter, P. B. Understanding the language of Lys36 methylation at  
385 histone H3. *Nature Reviews Molecular Cell Biology* **13**, 115–126 (2012).
- 386 20. McDaniel, S. L. & Strahl, B. D. Shaping the cellular landscape with Set2/SETD2  
387 methylation. *Cellular and Molecular Life Sciences* **74**, 3317–3334 (2017).
- 388 21. Baubec, T. *et al.* Genomic profiling of DNA methyltransferases reveals a role for  
389 DNMT3B in genic methylation. *Nature* **520**, 243–247 (2015).
- 390 22. Neri, F. *et al.* Intragenic DNA methylation prevents spurious transcription initiation.  
391 *Nature* **543**, 72–77 (2017).
- 392 23. Zheng, W. *et al.* Sinefungin derivatives as inhibitors and structure probes of protein  
393 lysine methyltransferase SETD2. *J. Am. Chem. Soc.* **134**, 18004–18014 (2012).
- 394 24. Yang, S. *et al.* Molecular basis for oncohistone H3 recognition by SETD2  
395 methyltransferase. *Genes Dev.* **30**, 1611–1616 (2016).
- 396 25. Bush, K. M. *et al.* Endogenous mammalian histone H3.3 exhibits chromatin-related  
397 functions during development. *Epigenetics Chromatin* **6**, 7 (2013).
- 398 26. Jang, C.-W., Shibata, Y., Starmer, J., Yee, D. & Magnuson, T. Histone H3.3 maintains  
399 genome integrity during mammalian development. *Genes Dev.* **29**, 1377–1392 (2015).
- 400 27. Wen, D. *et al.* Histone variant H3.3 is an essential maternal factor for oocyte  
401 reprogramming. *Proc. Natl. Acad. Sci. U. S. A.* **111**, 7325–7330 (2014).
- 402 28. Kong, Q. *et al.* Histone variant H3.3-mediated chromatin remodeling is essential for  
403 paternal genome activation in mouse preimplantation embryos. *J. Biol. Chem.* **293**,  
404 3829–3838 (2018).
- 405 29. Yuen, B. T. K., Bush, K. M., Barrilleaux, B. L., Cotterman, R. & Knoepfler, P. S. Histone  
406 H3.3 regulates dynamic chromatin states during spermatogenesis. *Development* **141**,  
407 3483–3494 (2014).
- 408 30. Bachu, M. *et al.* A versatile mouse model of epitope-tagged histone H3.3 to study  
409 epigenome dynamics. *J. Biol. Chem.* jbc.RA118.005550 (2018).  
410 doi:10.1074/jbc.RA118.005550
- 411 31. Franco, H. L. & Kraus, W. L. No Driver behind the Wheel? Targeting Transcription in  
412 Cancer. *Cell* **163**, 28–30 (2015).
- 413 32. Nicodeme, E. *et al.* Suppression of inflammation by a synthetic histone mimic. *Nature*  
414 **468**, 1119–1123 (2010).
- 415 33. Delmore, J. E. *et al.* BET bromodomain inhibition as a therapeutic strategy to target c-  
416 Myc. *Cell* **146**, 904–917 (2011).



- 417 34. Glass, C. K. & Natoli, G. Molecular control of activation and priming in macrophages.  
418 *Nature Immunology* **17**, 26–33 (2016).  
419 35. Pope, S. D. & Medzhitov, R. Emerging Principles of Gene Expression Programs and  
420 Their Regulation. *Molecular Cell* **71**, 389–397 (2018).  
421



**Figure 1**

**A**

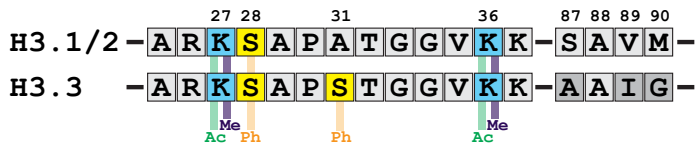

**B**

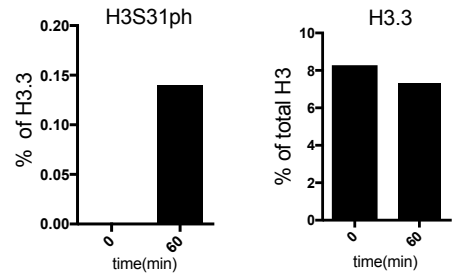

**C**

bioRxiv preprint doi: <https://doi.org/10.1101/808048>; this version posted October 17, 2019. The copyright holder for this preprint (which was not certified by peer review) is the author/funder, who has granted bioRxiv a license to display the preprint in perpetuity. It is made available under aCC-BY-NC-ND 4.0 International license.

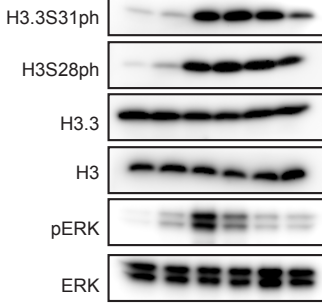

**D**

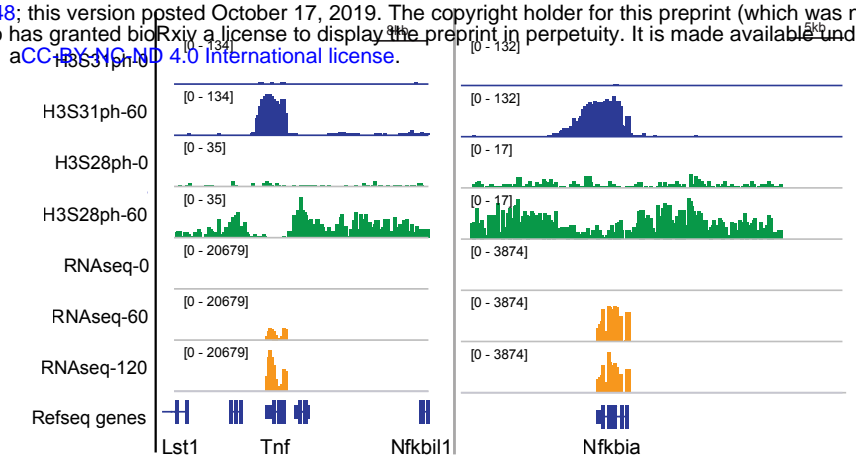

**E**

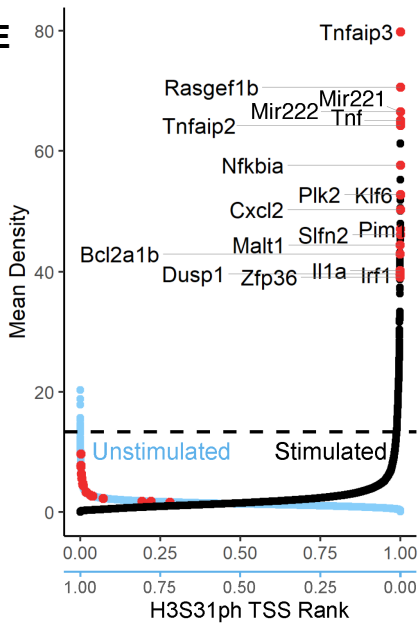

**F**

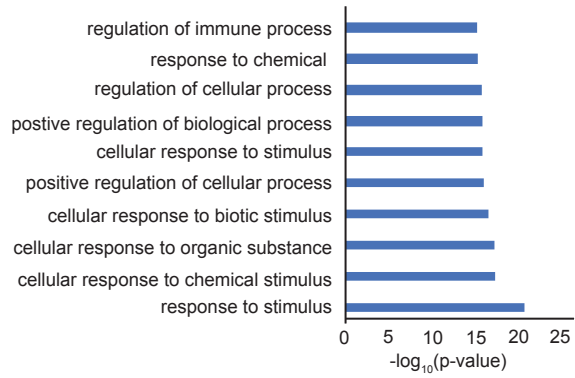

**G**

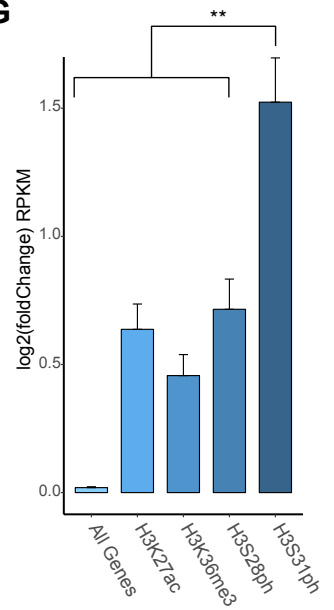

**Figure 1: Histone H3 variant, H3.3, is phosphorylated at stimulation induced genes during the macrophage response to pathogen sensing.** (A) Histone H3 sequence comparison between “canonical” H3.1/2 and variant H3.3 amino-terminal tails (residues 25-37) and the chaperone-specifying motifs in the core domains (87-90), with key histone modifications labeled. (B) Quantitative mass spectrometry analysis of phosphorylated H3.3 at Ser 31 (H3.3S31ph), left, and total H3.3 protein, right, in resting (0 minutes) and bacterial lipopolysaccharide (LPS)-stimulated (60 minutes) mouse bone marrow derived macrophages (BMDM). (C) Western blot time course analysis of phospho-proteins, H3.3S31ph, H3S28ph, pERK in BMDM response to LPS at increments indicated (in minutes); total H3.3 and Erk as loading controls. (D) RNAseq tracks and H3.3S31ph and H3S28ph ChIPseq signals at 0 and 60 minutes of LPS-stimulation at the *Tnf* and *Nfkb1a* loci. (E) Dual rank order plot of H3.3S31ph ChIP signal density at all genes (TSS-TESS) in resting macrophages (ranked in reverse order, right to left, blue X-axis) and stimulated (60') macrophages (ranked left to right, black X-axis). Dotted line represents the top 1% threshold in stimulated macrophages. Red dots represent top stimulation-induced genes (FDR<0.05, fold change >2 between 0' and 60') among the top 0.2% of genes by H3.3S31ph ChIP density and are labeled in the 60' data. (F) Gene ontology (GO) analysis results for the top 1% of genes by rank ordered H3.3S31ph ChIPseq density in LPS-stimulated macrophages (60'). (G) Average RNAseq expression (by fold change) for gene sets consisting of all genes and top 1% of genes by ChIPseq density in stimulated macrophages for histone marks H3K27ac (TSS+/-4kb), H3K36me3 (TSS-TESS+2kb), H3S28ph(TSS+/-4kb), and H3S31ph (TSS-TESS+2kb). All genes  $n_{all}=16648$ ; Top 1% genes for all ChIP categories  $n_{TOP}=167$  (\*\* <0.001). Figure 1B is representative of 2 independent quantitative MS experiments. Figure 1C is representative of 3 or more experiments.

# Figure2

**A**

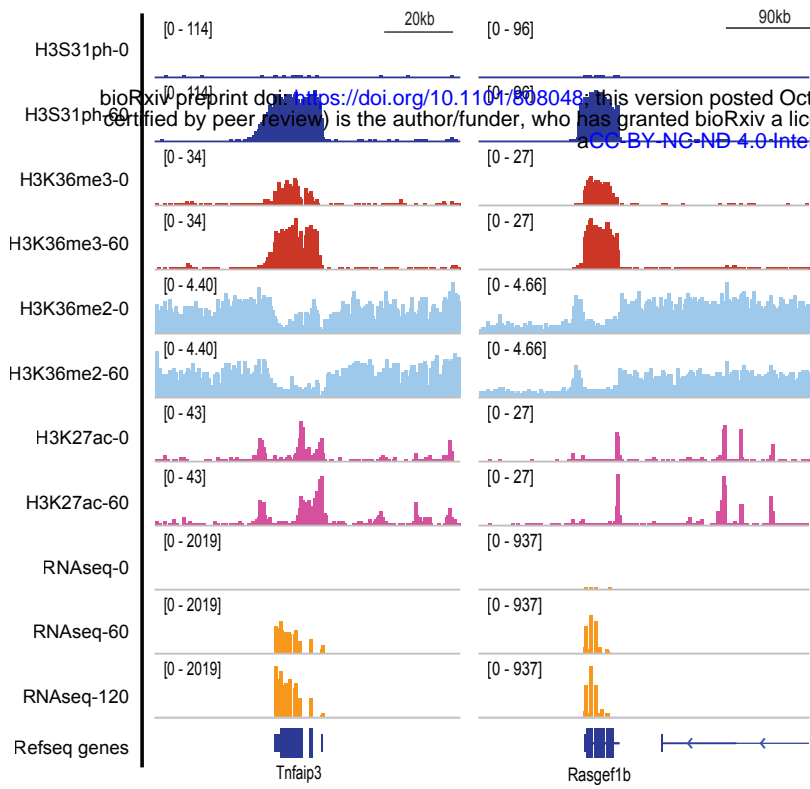

**B**

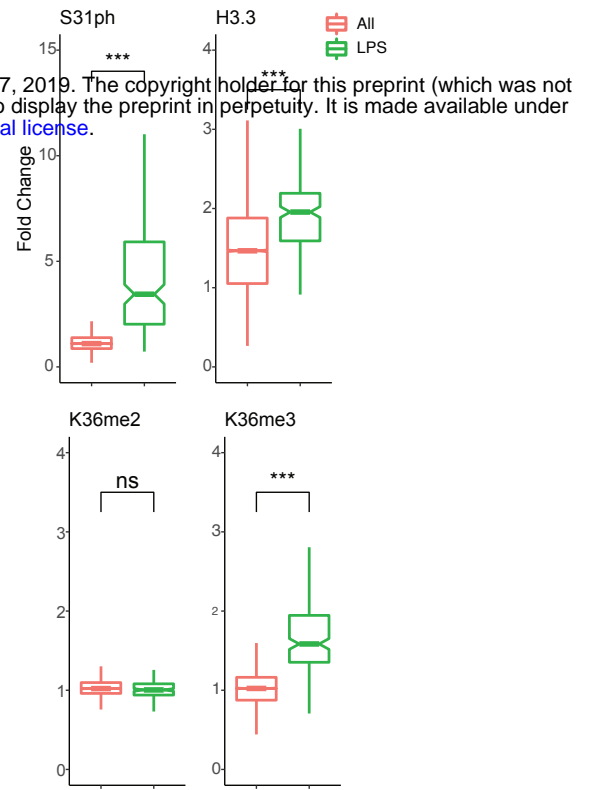

**C**

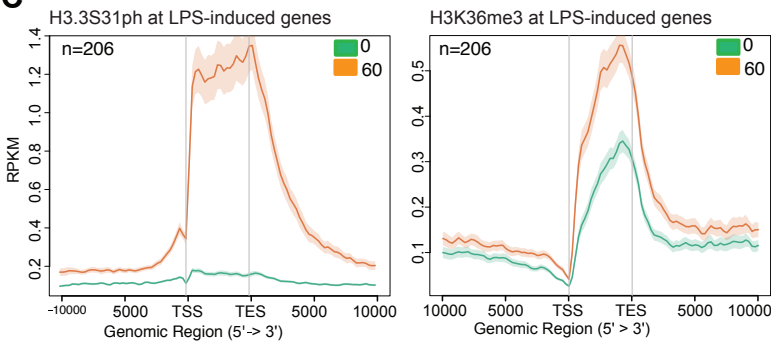

**D**

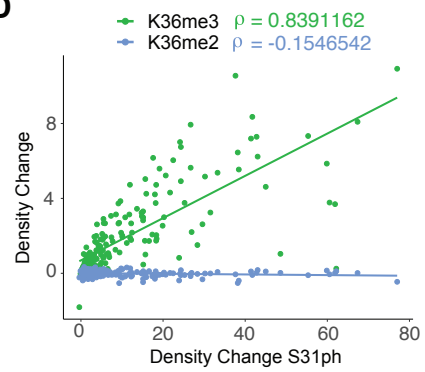

**Figure 2: Stimulation-induced H3.3S31ph is deposited in the gene-body of response genes and corresponds with H3K36me3.** **(A)** ChIPseq tracks of H3S31ph, H3K36me3, H3K36me3, H3K27ac ChIP (0 and 60 minutes) and RNAseq (0, 60, and 120 minutes) in LPS-stimulated macrophages for Rasgef1b and Tnfaip3. Additional genes and controls are shown in fig. S2. **(B)** ChIP-seq density fold change comparing the set of all genes (All) to RNAseq defined LPS-stimulated genes (LPS) for H3.3S31ph ( $p=1.22e-96$ ), H3.3 ( $p=1.63e-25$ ), H3K36me2, and H3K36me3 ( $p=1.22e-85$ ) by non-parametric Wilcoxon signed-rank test. All genes  $n_{all}=16648$ ; LPS genes  $n_{LPS}=206$ . **(C)** Average gene profiles of H3.3S31ph (left) and H3K36me3 (right) comparing RNAseq defined LPS-induced genes before and after stimulation. **(D)** Correlation plot showing absolute change (average read density 60' - 0' after LPS-stimulation) of H3K36me3 and H3K36me2 association with H3.3S31ph absolute change (average read density 60 - 0).

### Figure 3

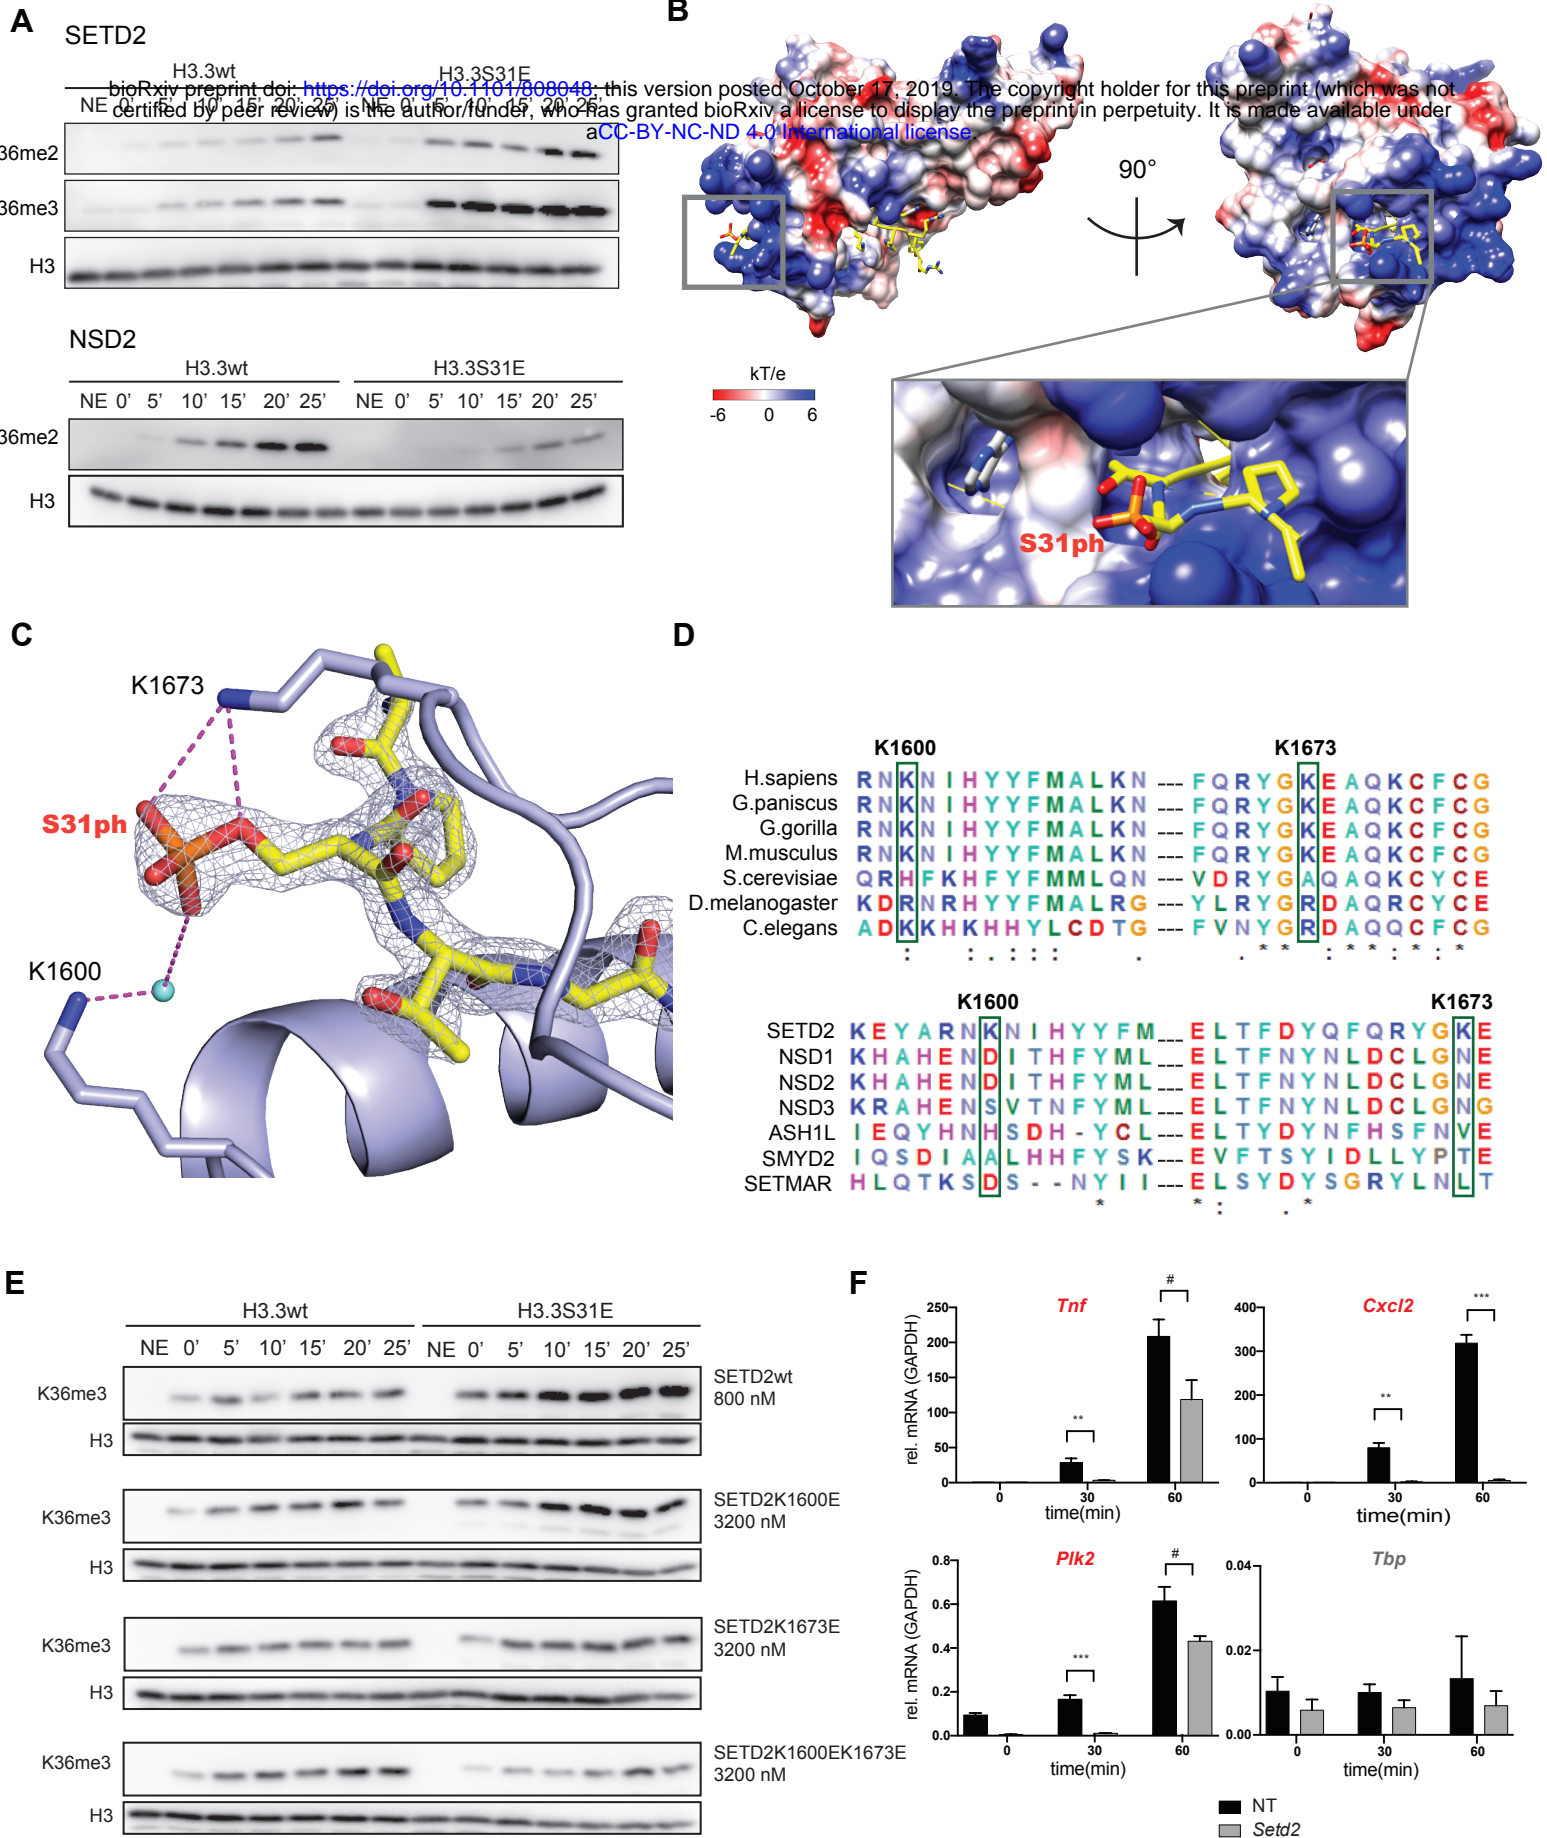



**Figure 3: The H3K36me3 methyltransferase SETD2 is stimulated by H3.3S31ph. (A)** Histone methyltransferase (HMT) assays with SETD2-SET domain and NSD2 full-length enzymes on H3.3wt and H3.3S31E nucleosomes. Reactions were stopped 0, 5, 10, 15, 20 and 25 minutes after adding the enzyme mix to the nucleosomes. Samples were analyzed by Western Blot for H3, HK36me2, and H3K36me3 (NSD2 did not show any signal for H3K36me3). **(B)** Crystal structure of SETD2-H3.3S31phK36M complex. SETD2 is presented as electrostatic potential surface. Electrostatic potential is expressed as a spectrum ranging from  $-6$  kT/e (red) to  $+6$  kT/e (blue). H3.3 peptide is shown as yellow sticks with S31 phosphate group labeled. **(C)** Interaction of the H3.3S31ph phosphate group with K1673 and K1600 of SETD2. The salt bridge bonding and water mediated hydrogen bonding are shown as magenta dashed lines. The peptide is shown as yellow sticks covered by the simulated annealing 2Fo-Fc omit map countered at the  $2.0 \sigma$  level. The water molecule is shown as aqua blue sphere. **(D)** Top, sequence alignment of SETD2 in different species, highlighting the conserved residues K1600 and K1673, except in *S. cerevisiae*. Bottom, sequence alignment of different H3K36 methyltransferases highlighting the specificity of residues K1600 and K1673 for SETD2. **(E)** HMT assays with SETD2-SET domain, wild type (wt), K1600E mutant, K1673E mutant and K1600E/K1673E double mutant on H3.3wt and H3.3S31E nucleosomes. As the overall activity of the mutant enzymes is reduced, enzyme concentration was titrated to best visualize the ratio of H3.3wt to H3.3S31E activity. **(F)** siRNA knockdown in BMDM for SETD2 or with non-targeting controls (NT) was performed for 2.5 days before LPS stimulation and RT-qPCR for LPS-induced genes *Tnf*, *Cxcl2*, *Plk2*, and *Tbp* (constitutively expressed control) at 0, 30, 60 minutes. *Setd2* knockdown efficiency is shown in fig. S4A. Enzymatic experiments presented in Figure 3A and 3E were repeated independently, three times, with separate nucleosome and recombinant enzyme preparations and comparable ratios of activities between H3.3wt and H3.3S31E nucleosomes were observed (Figure 3E). siRNA and RT-qPCR experiments (Figure 3F) are representative of 3 independent experiments. \*\*,  $p < 0.01$ ; \*\*\*,  $p < 0.001$ ; #,  $p = 0.07, 0.06$ , for *Tnf*, *Plk2*, respectively, Student t-test.

# Figure 4

**A**

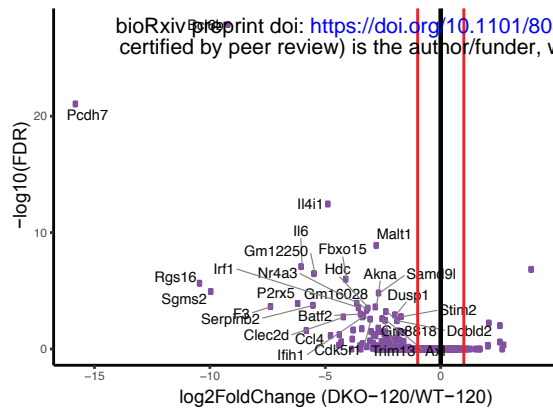

**B**

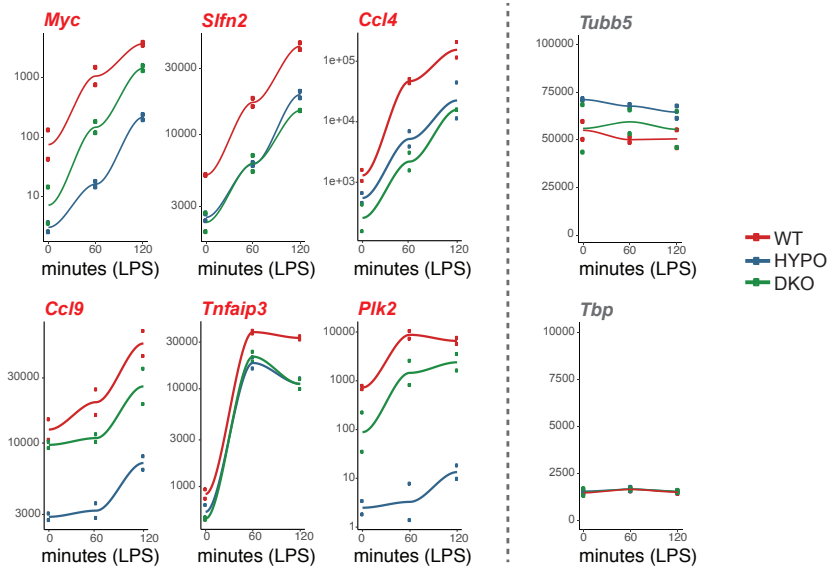

**C**

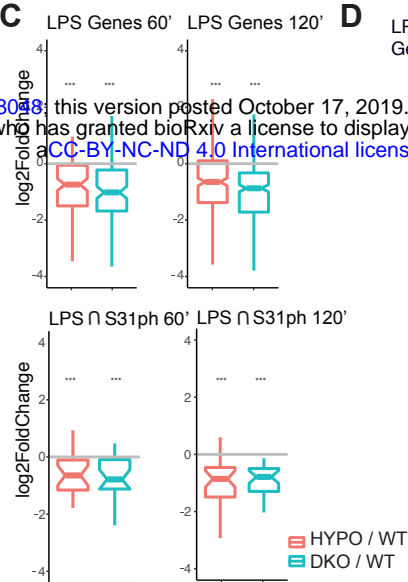

**D**

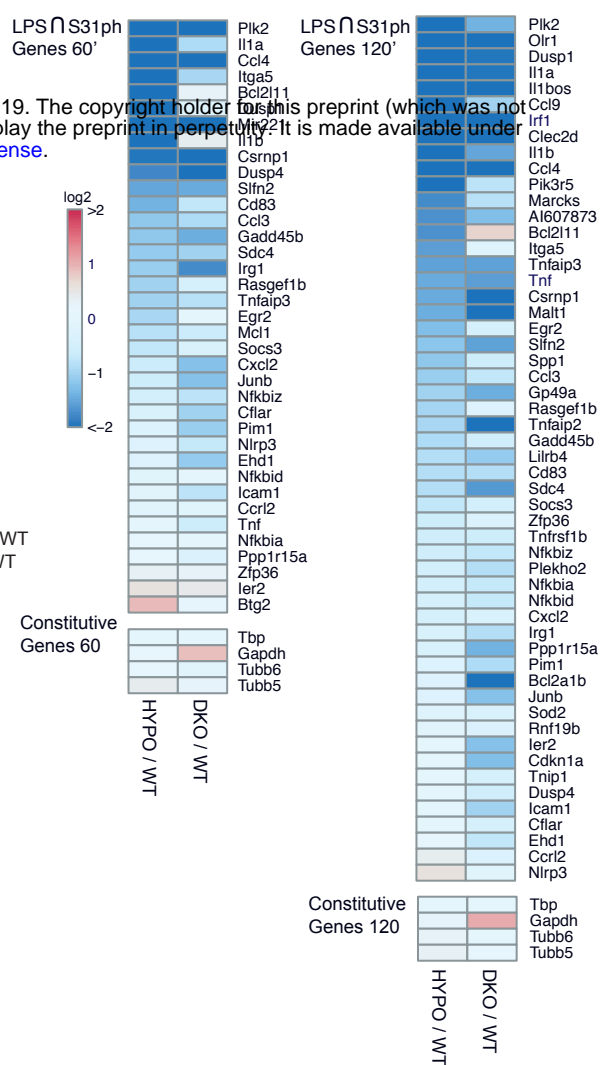

bioRxiv preprint doi: <https://doi.org/10.1101/808048>; this version posted October 17, 2019. The copyright holder for this preprint (which was not certified by peer review) is the author/funder, who has granted bioRxiv a license to display the preprint in perpetuity. It is made available under aCC-BY-NC-ND 4.0 International license.

**Figure 4: H3.3 is critical for stimulation-induced transcription of inflammatory genes. (A)** RNAseq scatter (“volcano”)-plot analysis, log<sub>2</sub> fold-change and -log<sub>10</sub>(FDR), of DKO compared to wt RAW247.6 at 120 minutes. **(B)** Time course plots of mean RNAseq expression (RPKM) from two experiments at time points 0', 60', and 120' after LPS-stimulation for experiments performed in wild-type (WT), hypomorph (HYPO), and double-knockout (DKO) RAW247.6 cell lines at LPS-induced genes *Myc*, *Ccl9*, *Sfn2*, *Tnfaip3*, *Ccl4*, *Plk2*, and constitutively expressed genes *Tubb5* and *Tbp*. **(C)** Ratio of RNAseq fold change (log<sub>2</sub>) for HYPO or DKO compared with WT at 60' and 120' LPS stimulation for all LPS induced genes (top) and for the intersection of top H3.3S31ph genes and LPS induced genes (bottom). \*\*\*<0.0001 by lower-tailed one-sample t-test (distribution below zero). **(D)** Heat map of fold change (log<sub>2</sub>) for top H3.3S31ph genes among LPS-induced genes (left, 60 minutes; right, 120 minutes) with control constitutively expressed genes below. RNAseq was performed with two biological replicates per condition.

A

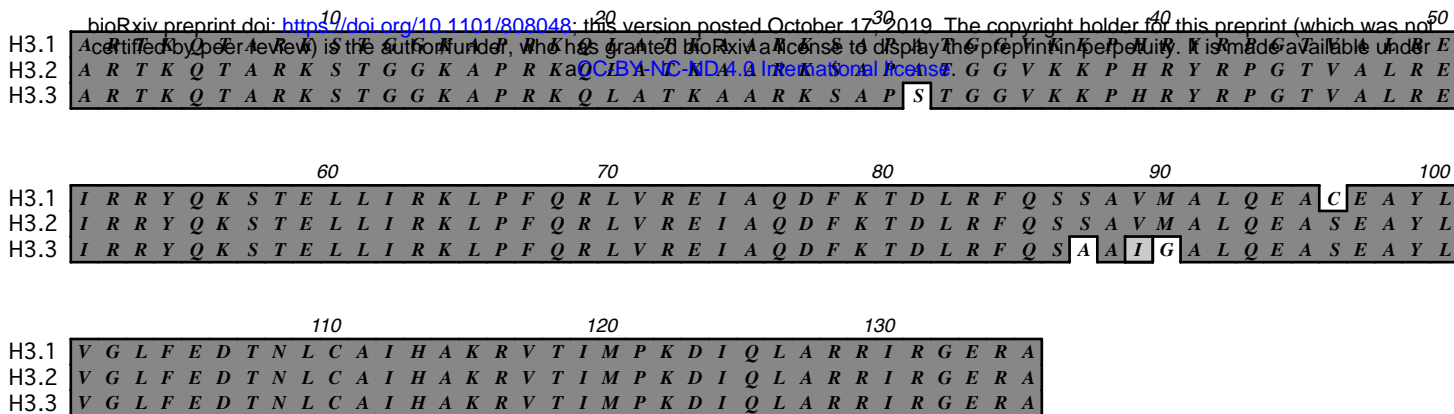

B

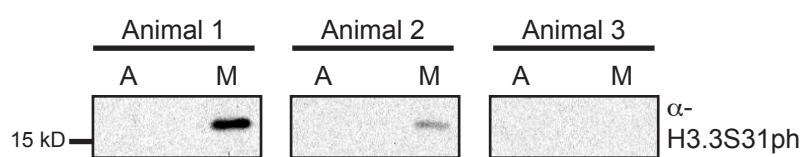

C

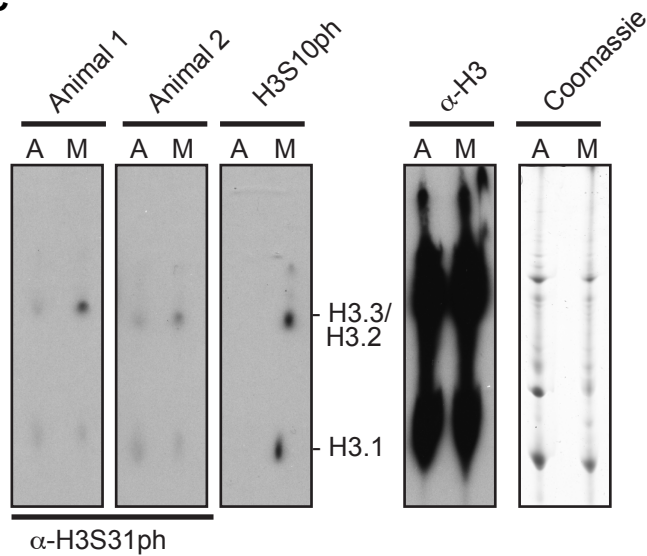

D

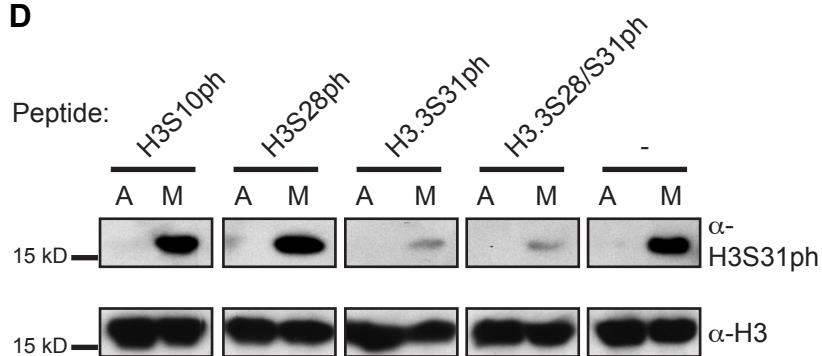

F

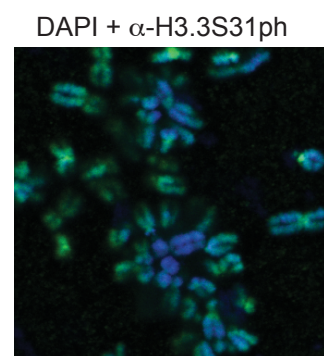

E

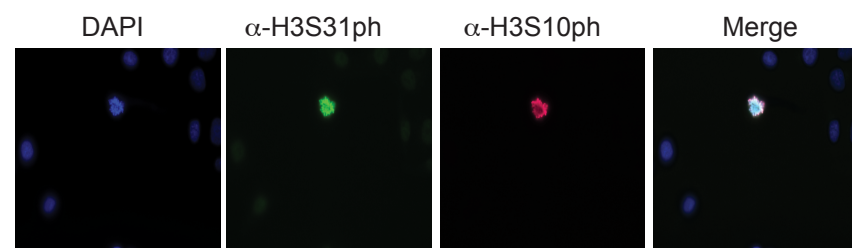

G

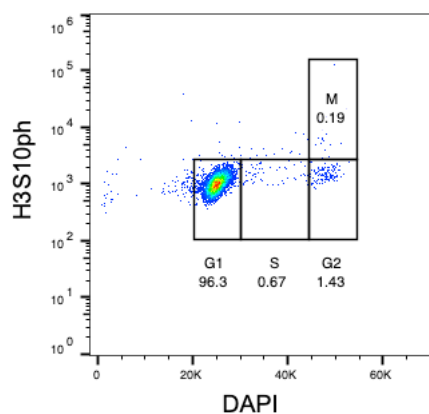

**Figure S1: Determination of anti-H3.3S31ph antibody specificity. (A)** Alignment showing H3.1, H3.2 and H3.3 and the differing amino acids in core and tail. **(B)** Immunoblot with acid-extracted histones from asynchronous growing “A” or nocodazole-arrested mitotic “M” HeLa cells using bleeds from three rabbits immunized with H3.3S31ph peptides. Bleeds from animals 1 and 2 show a signal of the molecular weight of histone H3 only with mitotic samples. **(C)** Immunoblot with acid-extracted histones from asynchronous “A” or mitotic “M” histones separated by 2D triton-acid urea (TAU) gels (left) that allow a separation of histone variants due to charge and amino acid differences. The bleed from animal 1 shows a signal of the size of H3.3. Coomassie blue staining of the gel and staining of the membrane with anti-H3 served as loading control (right). **(D)** Peptide competition experiment to determine antibody-specificity. Asynchronous “A” or mitotic “M” histones were separated by SDS-PAGE gels and blotted onto PVDF membranes. H3.3S31ph antibody from animal 1 was pre-incubated with diverse peptides or without any peptide, as indicated, before adding it to the PVDF membrane. Staining with anti-H3 antibody shows equal loading. **(E)** Deconvolved immunofluorescence microscopy images of asynchronously growing HeLa cells co-stained with DAPI (DNA, blue), anti-H3.3S31ph (animal 1, green) and anti-H3S10ph (marker of mitotic cells, red). Merged picture is shown on the right. Note that only mitotic cells, as apparent from stronger DAPI-staining and apparent H3S10ph signal, are H3.3S31ph positive. **(F)** Deconvolved image of chromosome spread from mitotic HeLa cells co-stained with DAPI (blue) and anti-H3.3S31ph (animal 1, green). Notice the stronger staining of H3.3S31ph at peri-centromeric regions, as has been shown previously. **(G)** Cell cycle analysis of BMDMs by FACS using DAPI and H3S10ph, with mitotic index gate shown, indicating post-mitotic nature of BMDMs.



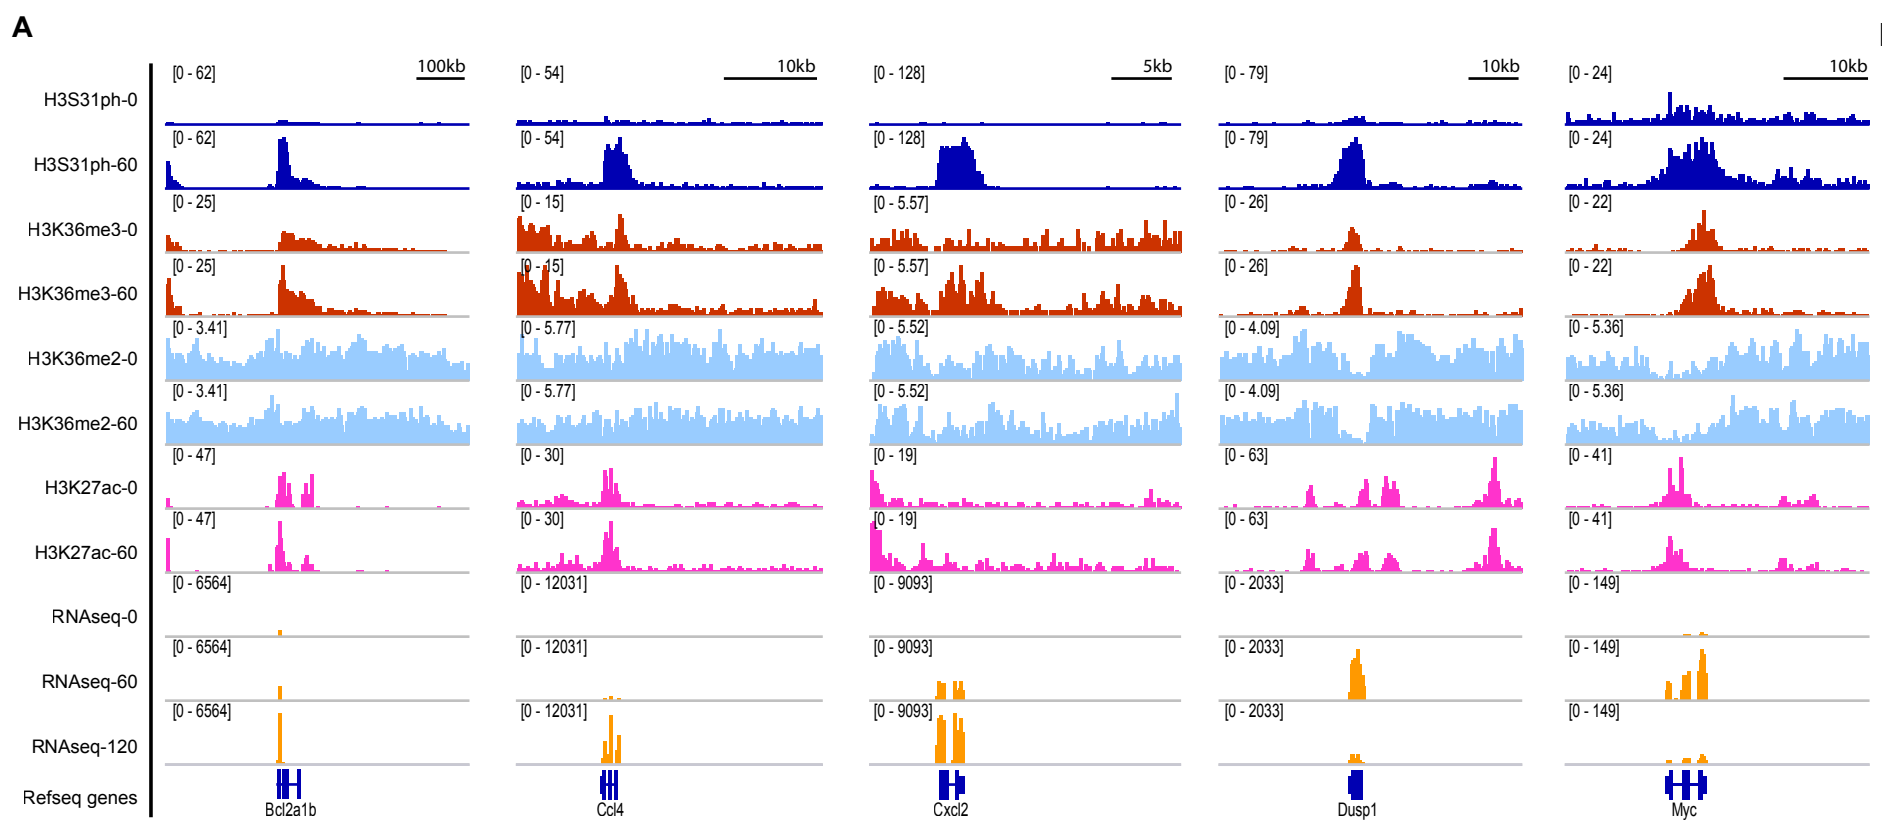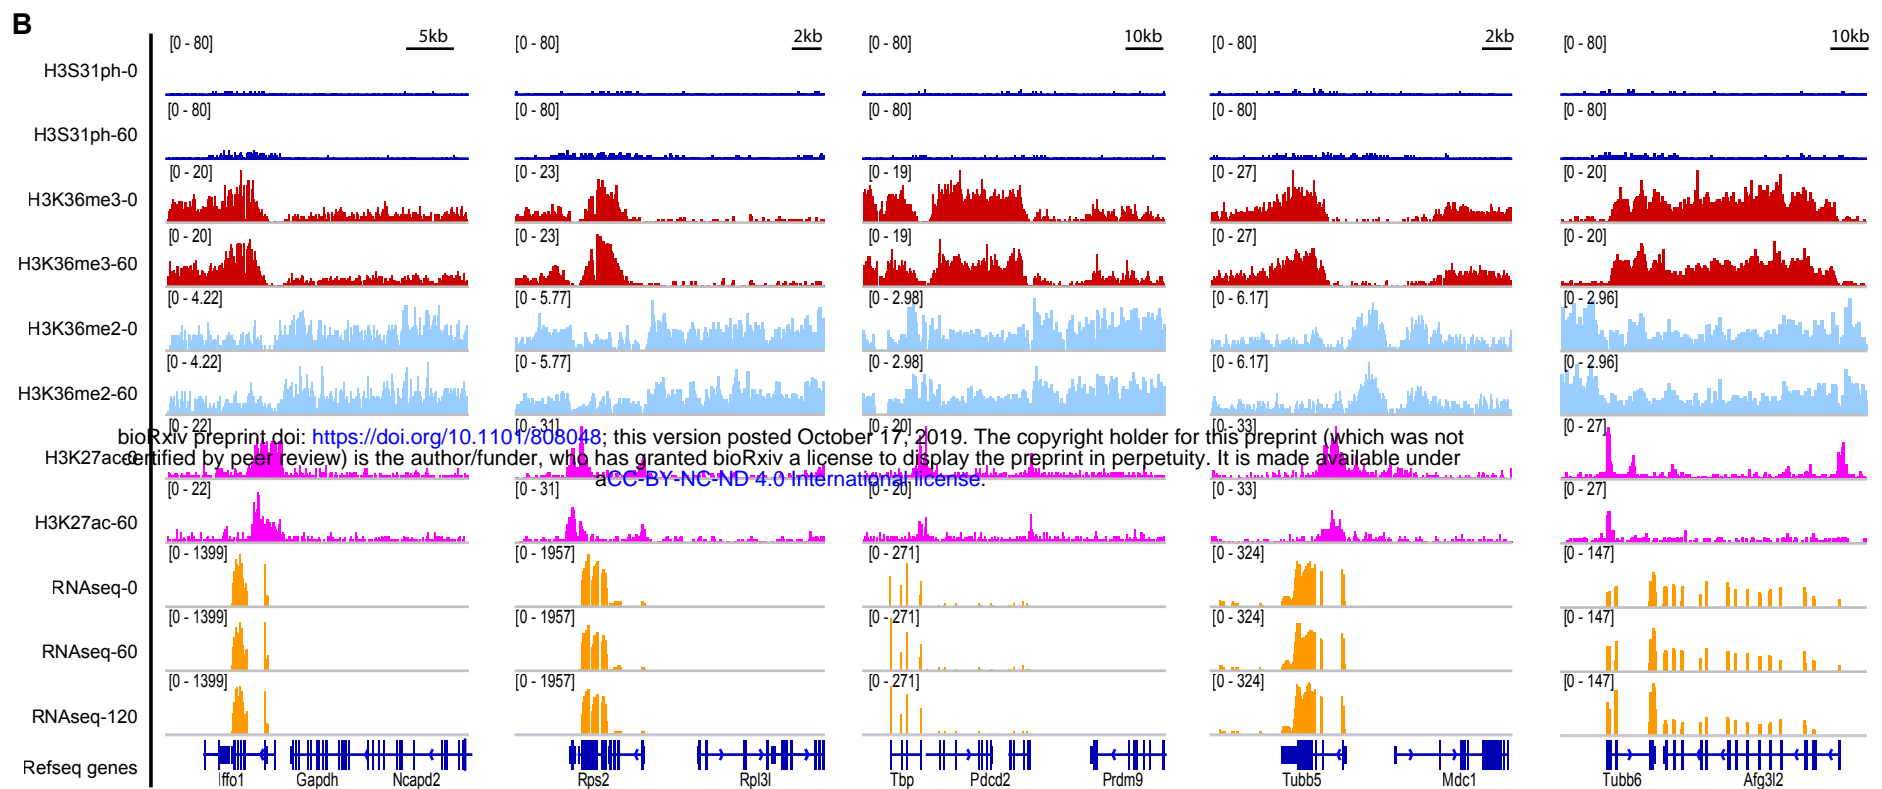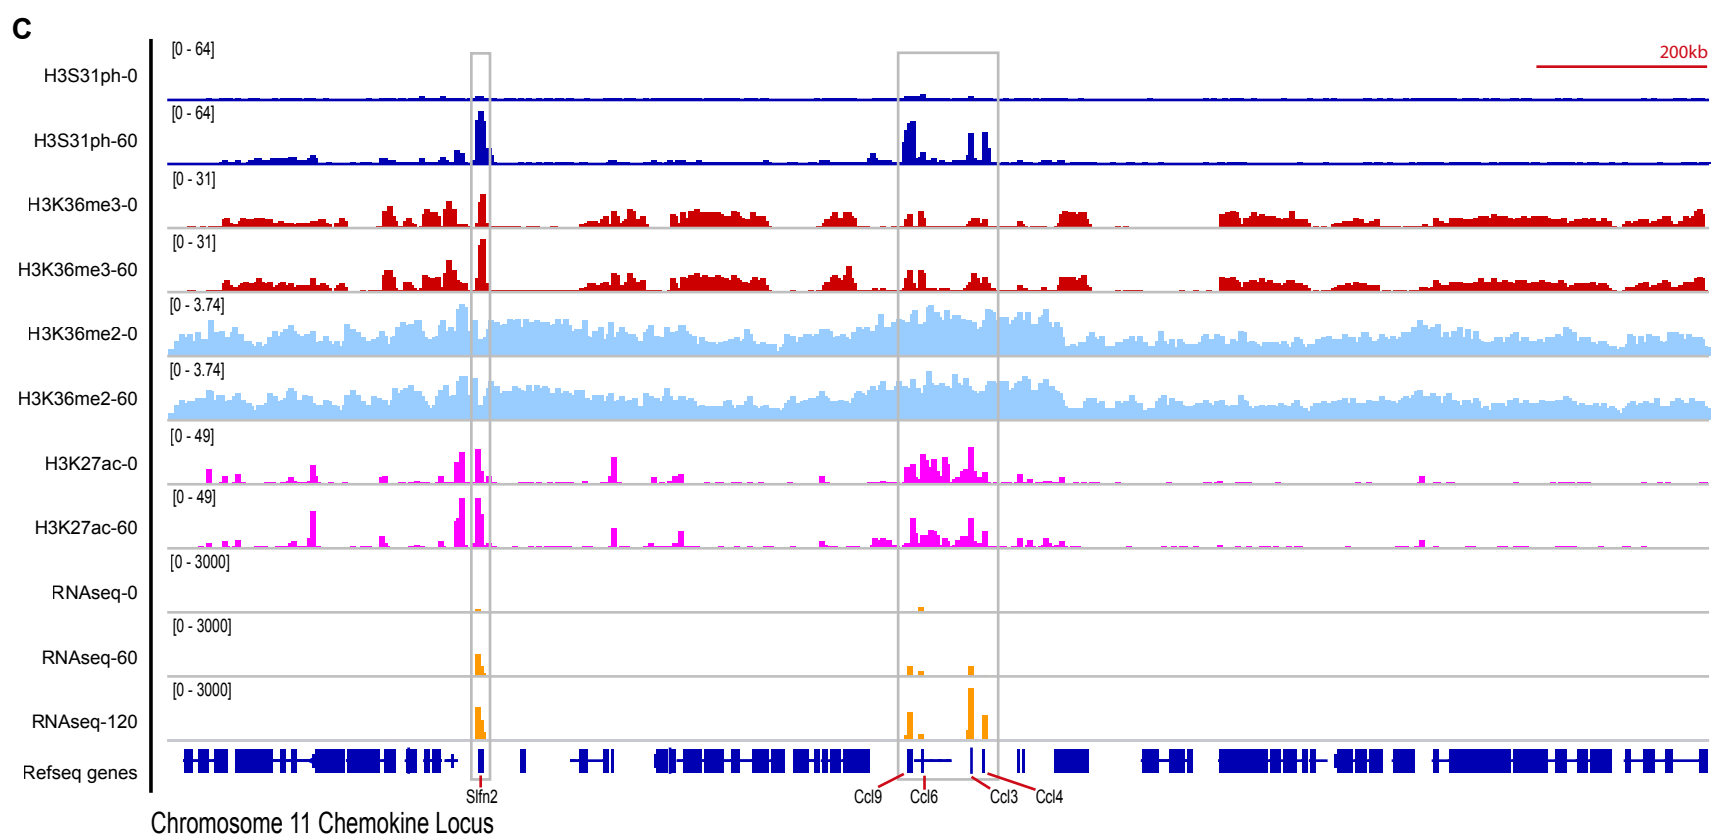

**Figure S2: H3.3S31ph is deposited in the gene-body of response genes but not constitutively expressed genes.** Additional examples of H3 PTMs including H3.3S31ph (as in Figure 2A) at **(A)** LPS-induced genes *Bcl2a1b*, *Ccl4*, *Cxcl2*, *Dusp1*, *Myc*; **(B)** constitutively expressed ("housekeeping") genes *Gapdh*, *Rps2*, *Tbp*, *Tubb5*, *Tubb6*; **(C)** across the gene dense chromosome 11 chemokine locus (>1Mb) containing LPS-induced genes *Slfn2*, *Ccl9*, *Ccl6*, *Ccl3*, *Ccl4*.

A

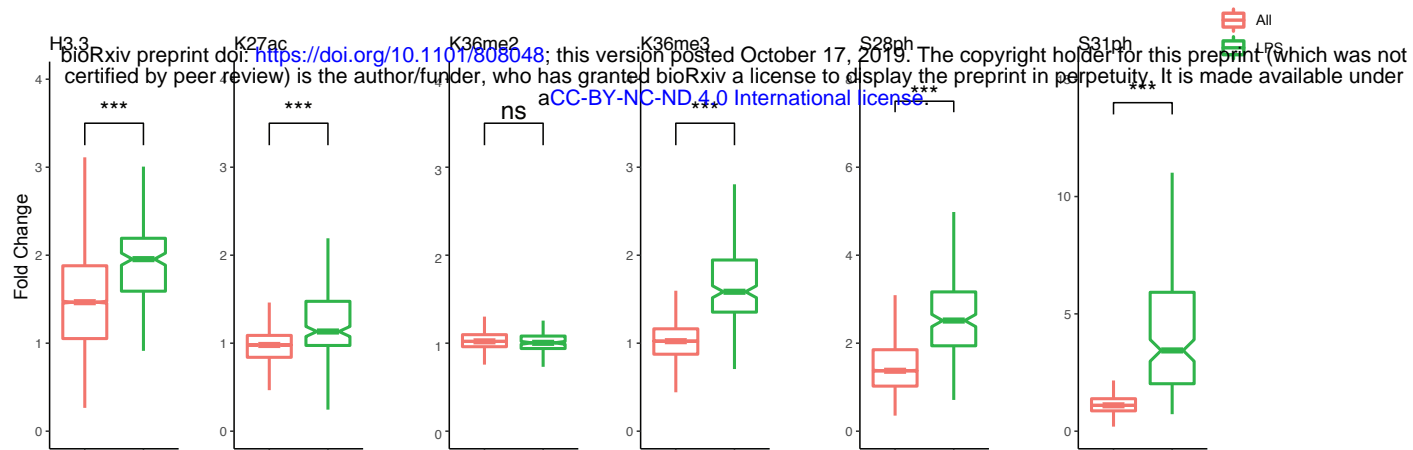

B

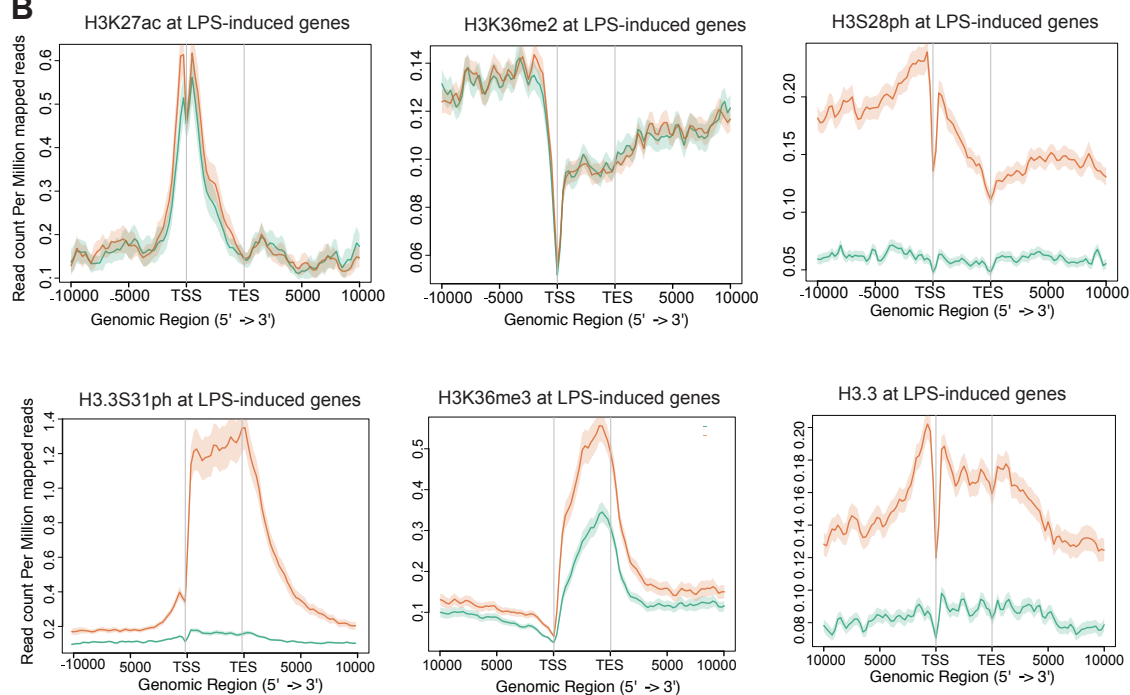

C

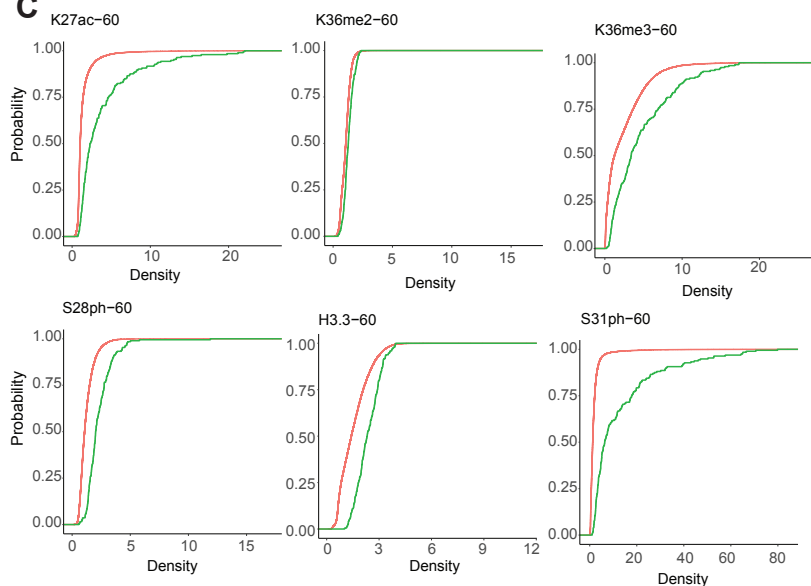

**Figure S3: H3.3S31ph and other H3 PTMs at response genes and after stimulation. (A)** Additional examples (H3K27ac and H3S28ph) of ChIP-seq density fold change comparing the set of all genes (All) to RNAseq defined LPS-stimulated genes to RNAseq defined LPS-stimulated genes (LPS) as shown in Figure 2B for (H3.3, K36me2, K36me3, S31ph) **(B)** Average gene profiles (in addition to H3.3S31ph and H3K36me3 in Figure 2, shown here are H3K27ac H3K36me2, H3S28ph and H3.3) comparing RNAseq defined LPS-induced genes before and after stimulation. **(C)** Cumulative distribution function (CDF) plots for H3K27ac H3K36me2, H3K36me3, H3S28ph, H3.3 and H3.3S31ph reveal selective role of H3.3S31ph compared with ubiquitous role of H3K36me3. \*\*\*<0.0001 by student t-test.

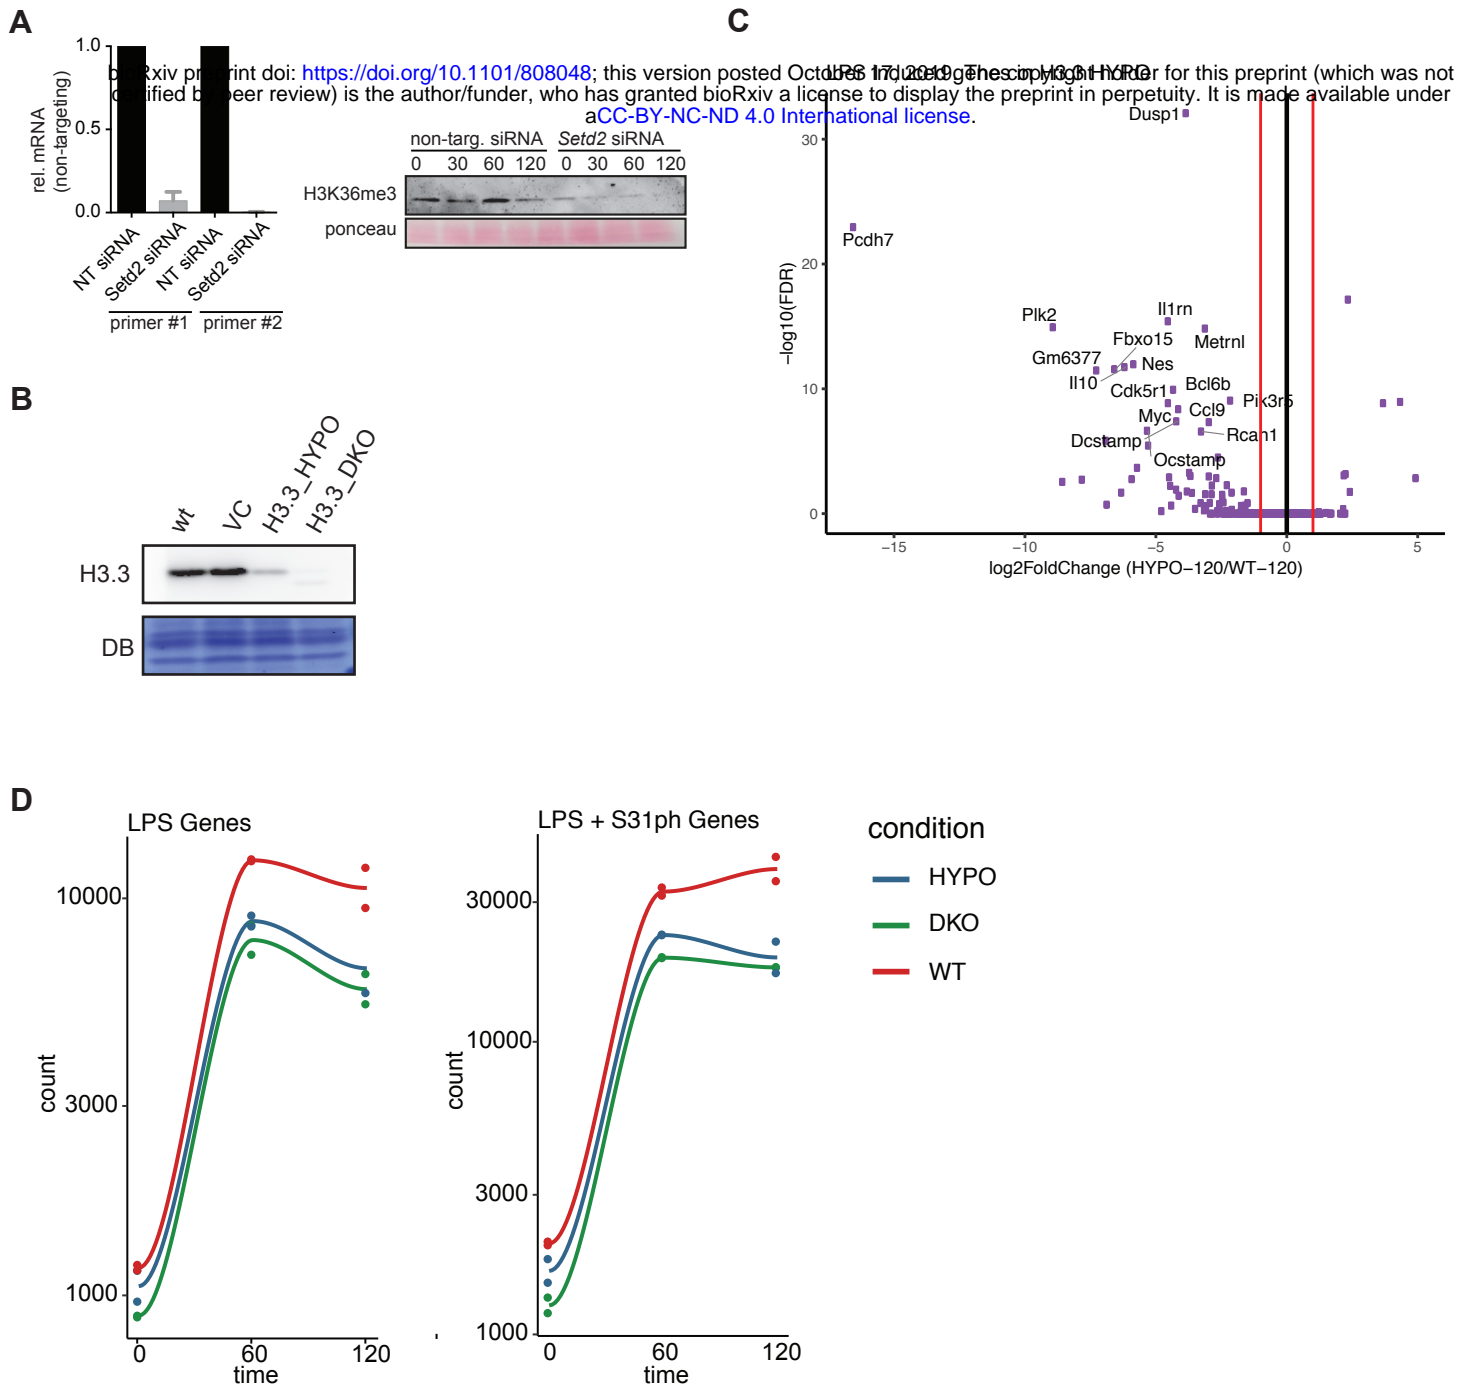



**Figure S4: Characterization of Setd2 knock down and H3.3 mutant RAW247.6 cell lines. (A)** siRNA knockdown validation of siRNA for *Setd2* using two RT-PCR primers (left) and western blot for H3K36me3 as a surrogate of Setd2 activity (right). **(B)** Western Blot for H3.3 comparing wild-type (WT), vector control (VC), hypomorph (HYPO), and double-knockout (DKO) RAW247.6 cell lines, membrane was stained with direct blue (DB) for equal loading. **(C)** RNAseq scatter (“volcano”)-plot analysis, log<sub>2</sub> fold-change and -log<sub>10</sub>(FDR), of HYPO compared to WT RAW247.6 at 120 minutes. Matches Fig. 4A, DKO plot. **(D)** Time course plots of mean RNAseq expression (RPKM) from two experiments at time points 0', 60', and 120' after LPS-stimulation for experiments performed in wild-type (WT), hypomorph (HYPO), and double-knockout (DKO) RAW247.6 cell lines at LPS-induced genes and at top H3.3S31ph genes among LPS-induced genes.

Table S1 Data collection and refinement statistics

| SETD2-SAH-H3.3S31phK36M                  |                                               |
|------------------------------------------|-----------------------------------------------|
| <b>Data collection</b>                   |                                               |
| Space group                              | P2 <sub>1</sub> 2 <sub>1</sub> 2 <sub>1</sub> |
| Cell dimensions                          |                                               |
| a, b, c (Å)                              | 61.1, 77.0, 77.4                              |
| α, β, γ (°)                              | 90, 90, 90                                    |
| Resolution (Å)                           | 50-1.78 (1.81-1.78)*                          |
| R <sub>merge</sub>                       | 7.5 (36.5)                                    |
| I/σI                                     | 27(3.7)                                       |
| Completeness (%)                         | 99.8 (97)                                     |
| Redundancy                               | 6.5 (5.9)                                     |
| <b>Refinement</b>                        |                                               |
| Resolution (Å)                           | 34.58 - 1.78                                  |
| No. reflections                          | 35706                                         |
| R <sub>work</sub> /R <sub>free</sub> (%) | 17.8/19.7                                     |
| No. atoms                                |                                               |
| Protein                                  | 1983                                          |
| Peptide/SAH/Zn                           | 112/26/3                                      |
| Water                                    | 284                                           |
| Others                                   | 12                                            |
| B-factors (Å <sup>2</sup> )              |                                               |
| Protein                                  | 30.5                                          |
| Peptide/SAH/Zn                           | 30.2/20.9/25.1                                |
| Water                                    | 38.2                                          |
| Others                                   | 46                                            |
| R.m.s. deviations                        |                                               |
| Bond lengths (Å)                         | 0.007                                         |
| Bond angles (°)                          | 1.18                                          |

\* Values in parentheses are for highest-resolution shell.

## 1 **Materials and Methods:**

2  
3 **ChIP-seq data processing and analysis:** H3S31ph, H3K36me3, H3K36me2, H3K27ac, H3S28ph, and H3.3  
4 ChIP-seq analyses were performed in bone marrow derived macrophages (BMDM) with an average range of 20-  
5  $25 \times 10^6$  reads per independent ChIP-seq experiment. ChIP-seq reads were mapped to the mm10 genome using  
6 Bowtie2 v.2.3.4.1<sup>1</sup> with the following parameters: -p 8 -k 1 -N 1. The aligned reads underwent three stages of  
7 filtering using SAMtools v.1.5<sup>2</sup>. First, the unmapped, non-primary, qc failed, and multi-mapped reads were  
8 discarded. PCR duplicates were then marked by Picard Tools v.2.14.0 (<http://broadinstitute.github.io/picard/>)  
9 using "VALIDATION\_STRINGENCY=SILENT and REMOVE\_DUPLICATES=false" options and removed by  
10 SAMtools (-F 1796). Then, chromosome M and scaffolds were removed to create the final filtered bam file. The  
11 final bam files were used to generate average profiles for RNA-seq define LPS-stimulated genes at time 60 for  
12 H3S31ph signal using ngs.plot v.2.61<sup>3</sup> at genebody using the following parameters: -FL 200 -MW 2. For  
13 visualization in IGV v.2.3.94<sup>4</sup>, the final bam files were converted to a tiled data file (.tdf) using igvtools v.2.3.98<sup>5</sup>  
14 including duplicates. Final bam files were converted to bigWig files of read coverages normalized to 1x depth of  
15 coverage as reads per genomic content (RPGC) using deeptools v2.5.4<sup>6</sup> bamCoverage. To obtain a tab-delimited  
16 file of average scores comprised of all bigWig files for each experiment, deeptools multiBigwigSummary  
17 performed the analysis for regions defined by a General Transfer Format (GTF) vM3 Annotation BED file. The  
18 BED file was constructed using the BEDOPS v.2.4.29<sup>7</sup> gtf2bed conversion utility and, depending on strand  
19 direction, extending the feature at both the start and end position by 2kb (H3S31ph, H3K36me3, H3K36me2,  
20 H3.3) or 4kb (H3S28ph, H3K27ac) to account for promoters (+/-2kb) or histone marks found outside of gene body  
21 (+/- 4kb). The resulting tab-delimited file of read densities was used for downstream analysis in R v.3.4.0<sup>8</sup>. Top  
22 H3S31ph genes were defined by a 2-fold or greater increase in H3S31ph enrichment at time 60 after LPS  
23 stimulation with FDR < 0.05. Top genes for all other epigenetic marks, such as H3K27ac, H3K36me3, H3S28ph,  
24 were defined in the same manner. The top H3S31ph genes enriched at time 60 were used as a target list for gene  
25 ontology analysis by the tools Gorilla<sup>9</sup> and REVIGO<sup>10</sup>.

26  
27 **RNA-seq data processing and DESeq2 analysis:** Paired-end RNA-seq reads were obtained from biological  
28 triplicates at times 0, 60, and 120 after LPS stimulation in BMDMs. Single-end RNA-seq reads were also obtained  
29 from technical duplicates at times 0, 60, and 120 after LPS stimulation for KO comparisons for WT BMDM, cell  
30 line hypomorph 3.205, and cell line knockout 264. Both paired-end and single-end RNA-seq were processed the  
31 same. The fastq files underwent adapter trimming and quality control analysis using wrapper Trim Galore v.0.5.0.  
32 The resulting trimmed fastq files were aligned to the GENCODE vM3 transcriptome in mm10 using STAR aligner  
33 v.2.4.2<sup>11</sup> with default settings. The utility featureCounts<sup>12</sup> from Subread v.1.4.6 was used to calculate raw counts  
34 reads per gene to be used as input for differential expression analysis by DESeq2<sup>13</sup>.

35  
36 **Antibodies:** a-H3.3S31ph (developed by Pineda Antikörper-Service), a-H3S28ph (clone E191, ab32388 Abcam),  
37 H3.3 (09-838, EMD), a-p44/42 MAPK, Erk1/2 (4695 Cell Signaling), a-phospho-p44/42 MAPK (Erk1/2) (4370,  
38 Cell Signaling), a-H3 (ab1791 Abcam), a-H3K27ac (39133, Active Motif), a-H3K36me3 (61021, Active Motif), a-  
39 H3K36me2 (2901, Cell Signaling).

40  
41 **a-H3.3S31ph Antibody Development:** For the generation of an H3.3S31ph-specific polyclonal antibody, a peptide  
42 spanning amino acids 26 to 37 from H3.3 containing phosphorylated serine 31 (RKSAPS(ph)TGGYKK, note the  
43 exchange of V35Y due to enhanced immunogenicity) was used for immunization of three rabbits by the Pineda-  
44 Antikörper-Service company (Berlin, Germany). Last bleed from animal 1 was affinity purified and used in this study.  
45 Antibody specificity was tested in immunoblots and 2D-Triton Acid Urea (2D-TAU) gels with acid-extracted histones  
46 as described previously<sup>14</sup>. Peptide competition experiments were done as described previously<sup>15</sup> using peptides  
47 that were N-terminally biotinylated and synthesized with higher than 80% purity by GenScript USA Inc. All peptides  
48 contained the general H3.3 sequence (aa 20-39; BIO-LATKAARKSAPSTGGVKKPH) with respective  
49 phosphorylations on serines 10, 28 and/or 31. For immunofluorescence microscopy HeLa Kyoto cells were grown  
50 on coverslips, washed, fixed, permeabilized and stained as described previously<sup>16</sup>. Chromosome spreads were  
51 generated as described<sup>17</sup>. Wide-field fluorescence imaging was performed on a PersonalDV microscope system  
52 (Applied Precision) equipped with a 60x/1.42 PlanApo oil objective (Olympus), CoolSNAP ES2 interline CCD  
53 camera (Photometrics); Xenon illumination and appropriate filtersets. Iterative 3D deconvolution of image z-stacks  
54 was performed with the SoftWoRx 3.7 imaging software package (Applied Precision).

55  
56 **Chromatin Immunoprecipitation:** As previously described in Josefowicz et al., 2016.

57  
58 **Primary Cell Culture:** As previously described in Josefowicz et al., 2016. HeLa Kyoto cells were grown as  
59 described<sup>15</sup>.

60

61 **Cell Culture, siRNA transfection:** For siRNA transfection RAW cells were reverse transfected with  
62 Lipofectamine RNAiMAX (Life Technologies) and ON-TARGETplus SMARTpool siRNAs against mouse SETD2,  
63 CHK1 and CHK2. After 72h, cells were either harvested for gene expression or western blot analysis.  
64

65 **RNA extraction, quantitative real-time PCR and RNA sequencing:** RNA was isolated using RNeasy Kit  
66 (Qiagen). For RT-PCR extracted RNA was treated with DNase and cDNA was synthesized using High-Capacity  
67 cDNA Reverse Transcription Kit (Applied Biosystems). qPCR was performed using SYBR green dye (Applied  
68 Biosystems) and normalized to GAPDH. For RNA sequencing libraries were prepared using according to the  
69 Illumina TruSeq protocol and were sequenced on Illumina HiSeq 2500 / NextSeq 500.  
70

71 **Antibody-based methods:** (flow cytometry and western blotting) As previously described in Josefowicz et al.,  
72 2016.  
73

74 **Mass Spectrometry Analysis of Histone Post-Translational Modifications:** As previously described in  
75 Josefowicz et al., 2016.  
76

77 **Nucleosome reconstitution:** All histones were expressed and purified as previously described (Ruthenburg et  
78 al., 2011). Nucleosome Assembly Octamers were reconstituted as described (Ruthenburg et al., 2011). The 601  
79 nucleosome positioning sequence was used for nucleosome reconstitution (Lowary and Widom, 1998). The DNA  
80 was amplified by PCR using HPLC purified primers containing a biotin tag on the 5' end to produce 189 bp linear  
81 DNA and purified using QIAEXII kit (Qiagen). Nucleosomes were assembled using the standard step-wise dialysis  
82 method (Dyer et al., 2004).  
83

84 **Bacterial recombinant protein:** Human SETD2<sup>1347-1711</sup> (original plasmid was a generous gift of Danny Reinberg)  
85 and point mutants were cloned into pETduet-smt3 (Mossessova E, Lima CD, 2000). The SETD2 wt and mutant  
86 fragments were expressed with an N-terminal His-tag in Rosetta (DE3, pLysS) cells with LB Media for 18 h at  
87 17°C by induction with 0.5 mM Isopropyl β-D-1-thiogalactopyranoside (IPTG). *E. coli* cells were resuspended in 50  
88 mM Tris pH 8.0, 500 mM NaCl, 1 mM PMSF, 2 mM BME, 10% glycerol, 10 mM imidazole supplemented with  
89 ROCHE COMPLETE protease inhibitors. After lysis with tip sonicator and centrifugation the cleared lysate was  
90 incubated for 1h with Ni-NTA resin slurry (Clonotech). After washing beads with the same buffer, the protein was  
91 eluted. The samples were incubated with Ubiquitin-like protease (Ulp) overnight at 4°C and subsequently  
92 incubated again with Ni-NTA resin to remove protease and cleaved tag. Supernatant was further purified by size-  
93 exclusion chromatography (Superdex 75, GE Healthcare).  
94

95 **HMT assay:** Standard HMT assays were performed in a total volume of 20 μL containing HMT buffer (50 mM  
96 Tris-HCl, pH 8.5, 50mM NaCl, 5 mM MgCl<sub>2</sub>, and 1 mM DTT) with 100 μM S-Adenosylmethionine (NEB) and 1.2μg  
97 of nucleosomes. The enzymes used were 30nM NSD2 full-length (Reaction Biology Corp), 800 nM SETD2-SET  
98 wt, and 3200 nM of SETD2K1600E, SETD2K1673E, SETD2K1600EK1673E. The reaction mixtures were  
99 incubated for 0,5,10,15,20 and 25 min at 30°C and stopped by adding 20ul of Laemmli Buffer. The results were  
100 analyzed by Western Blot.  
101

102 **Crystallography study of SETD2-H3.3S31phK36M complex:** Human SETD2 catalytic domain (residues 1434–  
103 1711) was expressed in *E. coli* and purified as previously described (Yang et al. 2016). Crystallization was  
104 performed via vapor diffusion method under 277K by mixing equal volumes (0.5ul) of SETD2-H3.3<sub>29-42</sub>S31phK36M-  
105 SAM (1:5:10 molar ratio, 8mg/ml) and reservoir solution containing 0.2M potassium thiocyanate, 0.1M Bis-Tris  
106 propane, pH 8.5, and 20% PEG 3350. The crystals were briefly soaked in a cryo- protectant drop composed of the  
107 reservoir solution supplemented with 20% glycerol and then flash frozen in liquid nitrogen for data collection.  
108 Diffraction data were collected at Shanghai Synchrotron Radiation Facility beamline BL17U under cryo conditions  
109 and processed with the HKL2000 software packages. The structures were solved by molecular replacement using  
110 the MolRep program (Vagin and Teplyakov 2010), with the SETD2-H3.3K36M complex structure (PDB code: 5JJY)  
111 as the search model. All structures were refined using PHENIX (Adams et al. 2010) with iterative manual model  
112 building with COOT (Emsley and Cowtan 2004). Detailed structural refinement statistics are in Supplemental Table  
113 S1. Structural figures were created using the PYMOL ([http:// www.pymol.org/](http://www.pymol.org/)) or Chimera  
114 (<http://www.cgl.ucsf.edu/chimera>) programs.  
115

116 **In vitro kinase assay and dot blot:** Recombinant CHK1 kinase (Sigma) was incubated with kinase buffer (40mM  
117 HEPES pH7.4, 20mM MgCl<sub>2</sub>), Magnesium/ATP cocktail (EMD) and histone tail peptides for overnight at 37°C (Total  
118 reaction 15ul, 2ug Peptide, Mg(4.5mM)/ATP(30uM) cocktail and 4ng Enzyme). The samples were then added with  
119 5ul of 0.5%SDS followed by boiling for 5min at 95°C. The samples were dropped on a dry nitrocellulose membrane  
120 and probed with a-H3S31ph antibody.  
121

122 **CRISPR targeting of H3.3:** CRISPR targeting *H3f3b* and *H3f3a* was performed in RAW264.7 cells using methods  
123 described in Ran et al. 2013<sup>18</sup>. Targeting was done consecutively first targeting *H3f3b*, then using *H3f3b* mutants  
124 to target *H3f3a*.  
125 The gRNAs (Primers caccTAGAAATACCTGTAACGATG forward aaacCATCGTTACAGGTATTTCTA reverse for  
126 *H3f3a* and caccGAAAGCCCCCGCAAACAGC forward aaacGCTGTTTTCGGGGGGCTTTC reverse for *H3f3b*)  
127 were cloned into PX458 (from Addgene) and sorted for GFP 24h after transfection, cells were first sorted as bulk  
128 and after recovery sorted into single cell clones. Positive clones were tested by PCR, sequencing and Western  
129 Blot.

130  
131

### 132 Supplemental Methods References

- 133 1. Langmead, B. & Salzberg, S. Fast gapped-read alignment with Bowtie2. *Nature Methods* **9**, 357-359 (2012).
- 134 2. Li, H.\*, Handsaker, B.\*, Wysoker, A., Fennell, T., Ruan, J., Homer, N., Marth, G., Abecasis, G., & Durbin, R.  
135 and 1000 Genome Project Data Processing Subgroup. The Sequence alignment/map (SAM) format and  
136 SAMtools. *Bioinformatics* **25**, 2078-9 (2009).
- 137 3. Shen, L., Shao, N., Liu, X. & Nestler, E. ngs.plot: Quick mining and visualization of next-generation  
138 sequencing data by integrating genomic databases. *BMC Genomics* **15**, 284 (2014).
- 139 4. Robinson, J.T., Thorvaldsdóttir, H., Winckler, W., Guttman, M., Lander, E.S., Getz, G., & Mesirov, J.P.  
140 Integrative Genomics Viewer. *Nature Biotechnology* **29**, 24-26 (2011).
- 141 5. Thorvaldsdóttir, H., Robinson, J.T., & Mesirov, J.P. Integrative Genomics Viewer (IGV): high-performance  
142 genomics data visualization and exploration. *Briefings in Bioinformatics* **14**, 178-192 (2013).
- 143 6. Ramírez, F., Ryan, D.P., Grüning, B., Bhardwaj, V., Kilpert, F., Richter, A.S., Heyne, S., Dündar, F., & Manke,  
144 T. deepTools2: a next generation web server for deep-sequencing data analysis. *Nucleic Acids Research* **44**,  
145 160-165 (2016).
- 146 7. Neph, S., Kuehn, M.S., Reynolds, A.P., et al. BEDOPS: high-performance genomic feature operations.  
147 *Bioinformatics* **28** (14), 1919-1920 (2012).
- 148 8. R Core Team. R: A language and environment for statistical computing. *R Foundation for Statistical*  
149 *Computing*, (2013).
- 150 9. Eden, E.\*, Navon, R.\*, Steinfeld, I., Lipson, D., & Yakhini, Z. GOrilla: A Tool For Discovery And Visualization  
151 of Enriched GO Terms in Ranked Gene Lists. *BMC Bioinformatics*, **10:48**, (2009).
- 152 10. Supek, F., Bošnjak, M., Škunca, N., & Šmuc, T. REVIGO summarizes and visualizes long lists of Gene  
153 Ontology terms. *PLoS ONE* **6(7)**, (2011).
- 154 11. Dobin, A. et al. STAR: ultrafast universal RNA-seq aligner. *Bioinformatics* **29**, 15-21 (2013).
- 155 12. Liao, Y., Smyth, G.K. & Shi, W. featureCounts: an efficient general purpose program for assigning sequence  
156 reads to genomic features. *Bioinformatics* **30**, 923-930 (2014).
- 157 13. Love, M.I., Huber, W., & Anders, S. Moderated estimation of fold change and dispersion for RNA-seq data  
158 with DESeq2. *Genome Biology* **15**, 550 (2014).
- 159 14. Shechter, D., Dormann, H. L., Allis, C. D. & Hake, S. B. Extraction, purification and analysis of histones. *Nat.*  
160 *Protoc.* **2**, 1445–1457 (2007).
- 161 15. Jack, A. P. M. et al. H3K56me3 Is a Novel, Conserved Heterochromatic Mark That Largely but Not  
162 Completely Overlaps with H3K9me3 in Both Regulation and Localization. *PLoS One* **8**, e51765 (2013).
- 163 16. Wiedemann, S. M. et al. Identification and characterization of two novel primate-specific histone H3 variants,  
164 H3.X and H3.Y. *J. Cell Biol.* **190**, 777–91 (2010).
- 165 17. Hake, S. B. et al. Serine 31 phosphorylation of histone variant H3.3 is specific to regions bordering  
166 centromeres in metaphase chromosomes. *Proc. Natl. Acad. Sci.* **102**, 6344–6349 (2005)..
- 167 18. Ran, F. A. et al. Genome engineering using the CRISPR-Cas9 system. *Nat. Protoc.* **8**, 2281–2308 (2013).
- 168
